# Supplementary material for: Feasibility and effectiveness of global intact forest landscape protection through forest certification: the conservation burden of intact forest landscapes
Source: Frontiers journal article supplement (doi:10.3389/ffgc.2024.1335430), 2024-06-24
Supplement: Table_1.xlsx [file Table_1.xlsx]

## Sheet: Sheet1
Number	Name	Company	Continent	Country	FSC	MU size (ha)	IFL size (ha)	Conservation Burden (%)	Fragments > 1 ha	Fragments > 100 ha
1	FML-2	Tolko	North America	Canada	No	8.78166e+06	2.95154e+06	33.6103	26	20
2	Cassiar TSA Block F04Fe	Unknown	North America	Canada	No	1.81738e+06	1.49313e+06	82.1587	29	21
3	Fort Nelson TSA Liard Block08A	Unknown	North America	Canada	No	3.35004e+06	1.47026e+06	43.8878	17	12
4	ООО «Группа компаний «УЛК» (ОП Пинежский леспромхоз)	ULK Group LLC	Eurasia	Russia	Yes	1812931	1.41876e+06	78.2576	27	16
5	PAG14b	Unknown	North America	Canada	No	7.34466e+06	1.41149e+06	19.2179	43	16
6	Nass TSA Block E43E	Unknown	North America	Canada	No	1.58505e+06	1.28092e+06	80.8127	11	9
7	95001	Unknown	North America	Canada	No	1.03594e+06	994054	95.9567	43	3
8	Prince George TSA Block A24A	Unknown	North America	Canada	No	951524	862949	90.6912	5	5
9	Ogoki Forest	Long Lake\Forest Products Inc.	North America	Canada	No	1.02531e+06	803124	78.3301	19	12
10	UAF 09451k	Unknown	North America	Canada	No	1.42725e+06	729426	51.107	31	11
11	Abitibi River Forest	Abitibi River Forest Management Inc.	North America	Canada	Yes	3.3404e+06	671409	20.0997	14	9
12	Whitefeather Forest	Unknown	North America	Canada	No	827246	622720	75.2763	23	14
13	Mee-Toos Forest Products Ltd.	Mee-Toos Forest Products Ltd. / Peter Ballantyne Cree Nation	North America	Canada	No	1.57793e+06	613151	38.8579	24	14
14	Prince George TSA Block B24B	Unknown	North America	Canada	No	1.22856e+06	550241	44.7873	11	10
15	Prince Albert	Paper Excellence	North America	Canada	No	3.23303e+06	523783	16.201	16	12
16	PAG07c	Unknown	North America	Canada	No	1.19063e+06	512436	43.0392	10	9
17	Karagoua	Unknown	Africa	Republic of Congo	No	604046	505919	83.7551	39	7
18	PAG03c	Unknown	North America	Canada	No	788857	459898	58.2992	38	20
19	UAF 09352r	Unknown	North America	Canada	No	589210	445027	75.5294	8	4
20	TFL41	Unknown	North America	Canada	No	680156	441635	64.9315	10	6
21	Caribou Forest	Bowater Canadian Forest Products Inc.	North America	Canada	No	629539	432264	68.6635	31	16
22	Fort St John TSA Block D40Db	Unknown	North America	Canada	No	749620	411981	54.9586	14	8
23	Northwest Communities	Northwest Communities	North America	Canada	No	774445	398492	51.4552	16	10
24	UFA Ngombe	IFO	Africa	Republic of Congo	Yes	1.16854e+06	395703	33.8629	59	10
25	АО "РФП Лесозаготовка"a	Unknown	Eurasia	Russia	No	998144	367827	36.8511	6	6
26	PAG12b	Unknown	North America	Canada	No	3.90002e+06	366442	9.39591	13	7
27	Kitsaki-Zelensky	Zelensky Bros.	North America	Canada	No	594066	361654	60.8777	11	5
28	Sunsh Coast TSA Powell R. Blk39Cu	Unknown	North America	Canada	No	512090	357424	69.7971	15	4
29	ООО ПКП «Титан» (бывш ООО «Пинежьелес»)	ICE Titan Ltd.	Eurasia	Russia	Yes	667586	355552	53.2594	39	19
30	Kenogami Forest	Terrace Bay Pulp Inc.	North America	Canada	No	1.91346e+06	348671	18.222	20	14
31	АО "Краслесинвест"	Unknown	Eurasia	Russia	No	1967559	334344	16.9928	19	12
32	АО «Онежский ЛДК»	Onega Sawmills JSC	Eurasia	Russia	Yes	1568313	329420	21.0048	33	22
33	Trout Lake Forest	Domtar Pulp and Paper Products Inc.	North America	Canada	No	937309	320516	34.1953	18	6
34	UAF 09452r	Unknown	North America	Canada	No	701746	318969	45.4537	14	8
35	ОАО «Тернейлес»	JSC Terneyles	Eurasia	Russia	Yes	1946546	316018	16.2348	32	16
36	PT.ESSAM TIMBER	Unknown	Asia	Indonesia	No	327781	310360	94.6852	5	5
37	Mbomo-kéllé	CONGO DEJIA WOOD INDUSTRY	Africa	Republic of Congo	No	697942	309822	44.3908	12	9
38	Ipendja	Unknown	Africa	Republic of Congo	No	461853	303312	65.673	5	2
39	Tala-tala	SIFCO	Africa	Republic of Congo	No	642303	295800	46.053	41	7
40	Jua-ikie	SEFYD	Africa	Republic of Congo	No	534925	292090	54.604	15	8
41	MacKenzie TSA Block B16B	Unknown	North America	Canada	No	548070	286324	52.2422	13	4
42	PAG03b	Unknown	North America	Canada	No	668342	281351	42.0968	9	5
43	Prince George TSA Block H24H	Unknown	North America	Canada	No	668338	281350	42.0969	9	5
44	АО "Югорский лесопромышленный холдинг"	Unknown	Eurasia	Russia	No	1010648	279068	27.6127	35	26
45	PAG01	Unknown	North America	Canada	No	986159	276531	28.0413	3	2
46	Prince George TSA Block E24E	Unknown	North America	Canada	No	967846	276531	28.5718	3	2
47	IWSA-1	Unknown	North America	Canada	No	618535	275101	44.4761	16	12
48	UAF 09351	Unknown	North America	Canada	No	1.92537e+06	273064	14.1824	39	8
49	63/14	SODEFOR	Africa	Democratic Republic of Congo	No	301475	270698	89.7912	2	1
50	MacKenzie TSA Block H16H	Unknown	North America	Canada	No	426617	251820	59.0272	6	6
51	Mid-Coast TSA Block F19F	Unknown	North America	Canada	No	290217	247971	85.4433	4	3
52	PT.WAPOGA III (d/h KAYU EKARIA) a	Unknown	Asia	Indonesia	No	387065	243449	62.8963	8	8
53	McBride TSA Block H17H	Unknown	North America	Canada	No	376019	241807	64.3072	13	7
54	UAF 02452bt	Unknown	North America	Canada	No	1.04763e+06	241165	23.02	17	7
55	GSEZ/GSEZW-Sud Ngounié	OLAM INTERNATIONAL	Africa	Gabon	No	404865	240680	59.4471	16	9
56	Lac Seul Forest	McKenzie Forest Products Inc.	North America	Canada	No	1.08519e+06	236097	21.7563	15	10
57	PAG02p	Unknown	North America	Canada	No	810797	233963	28.8559	18	7
58	Kamloops TSA Block 111Ad	Unknown	North America	Canada	No	752132	233963	31.1066	18	7
59	026/11	SIFORCO	Africa	Democratic Republic of Congo	No	295862	231637	78.2924	4	1
60	SUNRY GABON Nord Est	SUNRY GABON NORD-EST	Africa	Gabon	No	329517	221270	67.1498	19	10
61	UAF 02451q	Unknown	North America	Canada	No	449526	220806	49.1197	20	9
62	MacKenzie TSA Block F16Fb	Unknown	North America	Canada	No	313577	220770	70.4036	5	5
63	Pasquia-Porcupine	Edgewood Forest Products Ltd. / Weyerhaeuser Company	North America	Canada	No	1.94339e+06	219667	11.3033	11	7
64	АО "РФП Лесозаготовка"b	Unknown	Eurasia	Russia	No	2235920	218362	9.76607	47	33
65	PT.MEMBRAMO ALAS MANDIRI	Unknown	Asia	Indonesia	Yes	621464	215551	34.6843	13	11
66	TBNI	Transport Bois Negoce International	Africa	Gabon	No	421146	214903	51.0282	21	11
67	006/11	ITB	Africa	Democratic Republic of Congo	No	224734	213062	94.8063	1	1
68	Mimbeli ibenga	CIB	Africa	Republic of Congo	No	676766	212718	31.4316	3	3
69	ООО ПКП «Титан»	ICE Titan Ltd.	Eurasia	Russia	Yes	1230523	211237	17.1664	32	23
70	53/14	Unknown	Africa	Democratic Republic of Congo	No	255660	208736	81.6457	1	1
71	MacKenzie TSA Block E16Eb	Unknown	North America	Canada	No	218995	206091	94.1073	1	1
72	Mistik Management Ltd.	Mistik Management Ltd.	North America	Canada	Yes	1.70765e+06	205912	12.0582	4	4
73	Lillooet TSA Block 115A	Unknown	North America	Canada	No	736922	198965	26.9994	23	12
74	UAF 09551m	Unknown	North America	Canada	No	237367	197575	83.236	6	2
75	ООО "ЛесПроект"	Unknown	Eurasia	Russia	No	453950	196962	43.3884	14	13
76	Flona Jatuarana UMF II	Unknown	South America	Brazil	No	194367	194347	99.9894	1	1
77	ООО «ЛесПроект»	LesProekt LLC	Eurasia	Russia	Yes	445004	193912	43.5755	14	14
78	Leroy	LEROY GABON	Africa	Gabon	No	551412	190011	34.459	22	12
79	АО "Нью Форест Про"	Unknown	Eurasia	Russia	No	1002728	185881	18.5376	13	8
80	MacKenzie TSA Block I16I	Unknown	North America	Canada	No	403396	183752	45.5512	6	4
81	Mokabi dzanga	Unknown	Africa	Republic of Congo	No	578334	182534	31.5621	16	9
82	ООО "Усть-Покшеньгский ЛПХ"	Unknown	Eurasia	Russia	No	993837	182210	18.334	9	5
83	Grand Bois	Grand Bois	Africa	Gabon	No	354823	181857	51.2528	2	2
84	047/11	CFT	Africa	Democratic Republic of Congo	No	260921	179432	68.7686	2	1
85	59/14	Unknown	Africa	Democratic Republic of Congo	No	292564	176570	60.3527	2	2
86	SEEF	Société Equatoriale d'Exploitation Forestière	Africa	Gabon	No	406203	174255	42.8986	18	14
87	GIW-Minvoul	OLAM INTERNATIONAL	Africa	Gabon	No	183220	174080	95.0115	3	1
88	UAF 09452q	Unknown	North America	Canada	No	179363	173951	96.9827	2	1
89	ООО "ЛесТоргСервис"	Unknown	Eurasia	Russia	No	849535	173334	20.4033	8	6
90	Kootenay Lake TSA Block A13A	Unknown	North America	Canada	No	248561	172922	69.569	9	6
91	037/11	SODEFOR	Africa	Democratic Republic of Congo	No	219637	172877	78.7105	2	2
92	Cassiar TSA Block F04Fd	Unknown	North America	Canada	No	171111	171111	100	1	1
93	ООО «ЛесТоргСервис»	LesTorgServis LLC	Eurasia	Russia	Yes	805560	170115	21.1176	10	8
94	ООО "ПЛО ОНЕГАЛЕС"	Unknown	Eurasia	Russia	No	874345	169149	19.3458	21	13
95	TFL45b	Unknown	North America	Canada	No	204298	168773	82.6112	20	3
96	ООО "Группа компаний "УЛК" (ОП Виноградовский ЛПХ)	Unknown	Eurasia	Russia	No	589767	168441	28.5605	13	8
97	Flona Jatuarana UMF I	Unknown	South America	Brazil	No	175728	167022	95.0461	2	2
98	TFL1e	Unknown	North America	Canada	No	241802	166339	68.7913	7	5
99	025/11	Unknown	Africa	Democratic Republic of Congo	No	213273	166099	77.881	3	3
100	Fort Nelson TSA Ft Nelson Blk08B	Unknown	North America	Canada	No	2.14051e+06	165063	7.71141	10	5
101	ООО "Карпогорылес"b	Unknown	Eurasia	Russia	No	792483	163074	20.5776	26	18
102	ПАО "Онегалес"	Unknown	Eurasia	Russia	No	693321	161181	23.2476	11	9
103	UFA Loundoungou-Toukoulaka	CIB-OLAM	Africa	Republic of Congo	Yes	564135	160444	28.4407	178	51
104	GRANDE MAYUMBA	GRANDE MAYUMBA	Africa	Gabon	No	264827	158623	59.897	6	2
105	ООО "Логистик Лес"	ООО УК "БМ Групп"	Eurasia	Russia	No	319954	157848	49.3348	28	18
106	McBride TSA Block B17B	Unknown	North America	Canada	No	309939	155517	50.1765	8	5
107	Kispiox TSA Block A12A	Unknown	North America	Canada	No	312007	149652	47.9643	6	4
108	SUNLY OKONDJA	COFCO	Africa	Gabon	No	207800	149604	71.9944	19	5
109	Fort Nelson TSA Sikanni Block08C	Unknown	North America	Canada	No	654571	149269	22.8041	1	1
110	ООО «Усть-Покшеньгский ЛПХ»	Ust-Pokshengskiy LPH LLC	Eurasia	Russia	Yes	845777	148115	17.5122	10	6
111	54/14	Unknown	Africa	Democratic Republic of Congo	No	215210	147626	68.5962	4	3
112	58/14	Unknown	Africa	Democratic Republic of Congo	No	288414	147496	51.1405	5	5
113	Cassiar TSA Block F04Fc	Unknown	North America	Canada	No	145940	145940	100	1	1
114	Kalum TSA Block C10Ca	Unknown	North America	Canada	No	173843	145884	83.9175	2	2
115	038/11	SODEFOR	Africa	Democratic Republic of Congo	No	176419	145692	82.5828	2	1
116	Филиал ОАО «Группа «Илим» в Усть-Илимском районе	Ilim Group OJSC Ust-Ilimsk branch	Eurasia	Russia	Yes	2705991	143946	5.31954	27	10
117	North Coast TSA Skeena Block21Cx	Unknown	North America	Canada	No	355990	143873	40.4149	9	7
118	OLAM GABON / MOMBA	OLAM INTERNATIONAL	Africa	Gabon	No	198422	143190	72.1646	22	16
119	Export Négoce du Bois	HUA JIA	Africa	Gabon	No	148779	143013	96.1245	7	3
120	Balata UMF V	Unknown	South America	Brazil	No	151279	142232	94.0201	2	2
121	Armstrong Forest	Norampac Inc.	North America	Canada	No	486930	142149	29.1929	6	4
122	Kingcome TSA Broughton Block33Dz	Unknown	North America	Canada	No	254557	138644	54.4647	17	2
123	015/11	Unknown	Africa	Democratic Republic of Congo	No	219721	137684	62.6632	2	2
124	UAF 08666s	Unknown	North America	Canada	No	463256	137492	29.6795	5	5
125	K4C 1 SCHEDULE_B	KLAHOOSE FORESTRY LIMITED PARTNERSHIP	North America	Canada	No	160134	136085	84.982	1	1
126	Mid-Coast TSA Block E19Ea	Unknown	North America	Canada	No	294437	134610	45.7178	20	4
127	ОАО «Соликамскбумпром»	JSC Solikamskbumprom	Eurasia	Russia	Yes	1272489	133212	10.4686	16	11
128	GIW/GSEZW-Oyem	OLAM INTERNATIONAL	Africa	Gabon	No	212029	133020	62.7365	6	4
129	GSEZ-Olam Zolendé	OLAM INTERNATIONAL	Africa	Gabon	No	222106	132944	59.8563	8	6
130	Forestry Development Gabon	TBNI	Africa	Gabon	No	239236	132791	55.5063	12	10
131	009/11	Unknown	Africa	Democratic Republic of Congo	No	279023	130806	46.8801	1	1
132	Balata UMF IV	Unknown	South America	Brazil	No	130186	130186	100	1	1
133	ООО "Пинежьелес"	Unknown	Eurasia	Russia	No	401145	128196	31.9574	19	12
134	042/11	Unknown	Africa	Democratic Republic of Congo	No	320404	127012	39.6412	1	1
135	TFL38b	Unknown	North America	Canada	No	172815	126073	72.9524	2	2
136	MacKenzie TSA Block D16D	Unknown	North America	Canada	No	182465	123993	67.9543	1	1
137	UMF II Crepori	Unknown	South America	Brazil	No	134252	123110	91.7007	1	1
138	IWSA-2	Unknown	North America	Canada	No	1.23715e+06	121151	9.79277	2	2
139	09-001	Unknown	Africa	Cameroon	No	132459	119892	90.5127	8	3
140	MacKenzie TSA Block A16A	Unknown	North America	Canada	No	268229	118564	44.2026	10	4
141	60/14	Unknown	Africa	Democratic Republic of Congo	No	146722	118300	80.6287	2	1
142	UAF 09352p	Unknown	North America	Canada	No	136328	118292	86.7697	2	1
143	Kispiox TSA Block E12E	Unknown	North America	Canada	No	132059	118272	89.5603	2	2
144	ЗАО "Новоенисейский ЛХК"	Unknown	Eurasia	Russia	No	1252954	117117	9.34726	16	14
145	MacKenzie TSA Block J16J	Unknown	North America	Canada	No	251676	115299	45.8125	5	4
146	Bulkley TSA Block A03A	Unknown	North America	Canada	No	322194	115277	35.7788	8	7
147	Makoua	Unknown	Africa	Republic of Congo	No	724678	114512	15.8018	4	3
148	064/14	Unknown	Africa	Democratic Republic of Congo	No	259758	114222	43.9723	1	1
149	PT. RIMBA KARYA RAYATAMA	Unknown	Asia	Indonesia	No	142093	112905	79.4585	3	1
150	027/11	SIFORCO	Africa	Democratic Republic of Congo	No	215931	109626	50.7692	1	1
151	Kispiox TSA Block B12B	Unknown	North America	Canada	No	196358	109258	55.6421	5	4
152	55/14	Unknown	Africa	Democratic Republic of Congo	No	122955	107310	87.276	1	1
153	017/11	Unknown	Africa	Democratic Republic of Congo	No	137461	104867	76.2882	2	2
154	003/11	LA FORESTIERE	Africa	Democratic Republic of Congo	No	225974	104553	46.2678	6	3
155	002/11	Unknown	Africa	Democratic Republic of Congo	No	149569	103872	69.4478	1	1
156	PAG05f	Unknown	North America	Canada	No	726671	103667	14.266	19	7
157	Flona Pau-Rosa UMF III	Unknown	South America	Brazil	No	119207	103037	86.4358	5	2
158	021/11	Unknown	Africa	Democratic Republic of Congo	No	150209	102918	68.5167	1	1
159	Dawson Creek TSA Block A41Ac	Unknown	North America	Canada	No	310285	102550	33.0502	7	5
160	Golden TSA Block C07C	Unknown	North America	Canada	No	151419	102361	67.6014	2	2
161	023/11	SEFOCO	Africa	Democratic Republic of Congo	No	246497	102041	41.3963	2	2
162	PENG XIN SARL	Honest Timber	Africa	Gabon	No	441037	101658	23.0497	24	13
163	57/14	Unknown	Africa	Democratic Republic of Congo	No	110907	100607	90.713	1	1
164	Spanish Forest	Domtar Inc.	North America	Canada	Yes	1.10156e+06	99339.6	9.01809	32	10
165	Tolko Industries Ltd., Footner Forest Products Ltd. and La Crete Sawmills Ltd.	Tolko Industries Ltd., Footner Forest Products Ltd. and La Crete Sawmills Ltd.	North America	Canada	No	3.56382e+06	99205.6	2.78369	5	5
166	Dawson Creek TSA Block B41B	Unknown	North America	Canada	No	657349	99124.3	15.0794	5	3
167	FML-1	Unknown	North America	Canada	No	663924	99004.4	14.912	9	8
168	UMF IV Flona de Altamira	Unknown	South America	Brazil	Yes	111384	98130.3	88.1009	1	1
169	Hum UMF III	Unknown	South America	Brazil	No	99386.1	98045.1	98.6508	1	1
170	PT.SUMBER MITRA JAYA	Unknown	Asia	Indonesia	No	98023.5	98023.5	100	1	1
171	Kispiox TSA Block D12D	Unknown	North America	Canada	No	122430	97767.6	79.8559	3	3
172	65/14	SODEFOR	Africa	Democratic Republic of Congo	No	235947	97732.6	41.4214	5	4
173	PT.ARTIKA OPTIMA INTI UNIT IV (d/h. GREEN TIMBER)	Unknown	Asia	Indonesia	No	113551	97436.8	85.8091	1	1
174	ООО ПКП «Титан» (бывш ООО «Луковецклес»)	ICE Titan Ltd.	Eurasia	Russia	Yes	497930	97343.4	19.5496	6	3
175	ООО "Луковецклес"	Unknown	Eurasia	Russia	No	499134	97284.8	19.4907	5	3
176	CORA WOOD - UFA 3	CORA Wood	Africa	Gabon	No	244894	97105.2	39.6518	9	8
177	034/11	SODEFOR	Africa	Democratic Republic of Congo	No	197139	96970.1	49.1887	1	1
178	UAF 02663	Unknown	North America	Canada	No	430167	96426.6	22.4161	7	4
179	Pikounda nord	Unknown	Africa	Republic of Congo	No	96782	96358.8	99.5627	3	1
180	ООО «Лузалес»	Luzales OOO	Eurasia	Russia	Yes	1041181	94575.4	9.08347	20	12
181	Algoma Forest	Clergue Forest\Management Inc.	North America	Canada	Yes	1.48779e+06	94452.6	6.34853	4	4
182	Rimbunan Hijau Gabon	RIMBUNAN HIJAU GABON	Africa	Gabon	No	154371	92486.9	59.9122	10	5
183	052/14	Unknown	Africa	Democratic Republic of Congo	No	298244	92017.5	30.8531	1	1
184	PT.KAYU PUSAKA BUMI MAKMUR	Unknown	Asia	Indonesia	No	166927	91399.6	54.7543	2	2
185	PT.RISANA INDAH FOREST	Unknown	Asia	Indonesia	No	186281	89803.4	48.2086	6	5
186	PT. SUMALINDO LESTARI JAYA II	Unknown	Asia	Indonesia	No	257457	88006.6	34.1831	14	12
187	PT.WANATIRTA EDIWIBOWO	Unknown	Asia	Indonesia	No	205619	87239.4	42.4278	1	1
188	CFAD Kivoro	COMPAGNIE DES BOIS DU GABON	Africa	Gabon	Yes	218819	86774.5	39.6558	10	4
189	АО "Группа Илим" филиал в г. Коряжмеa	Unknown	Eurasia	Russia	No	1762120	86188.1	4.89116	6	5
190	Филиал ОАО «Группа «Илим» в г. Коряжме	Ilim Group OJSC Koryazhma branch	Eurasia	Russia	Yes	1851875	86188.1	4.6541	6	5
191	Flona Pau-Rosa UMF II	Unknown	South America	Brazil	No	89077	85059.1	95.4895	1	1
192	Revelstoke TSA Block X27X	Unknown	North America	Canada	No	123787	84906	68.5907	2	2
193	Golden TSA Block D07D	Unknown	North America	Canada	No	111945	84574	75.5496	6	2
194	PT.WAPOGA MUTIARA TIMBER II	Unknown	Asia	Indonesia	No	190446	83952.2	44.0818	2	2
195	016/11	Unknown	Africa	Democratic Republic of Congo	No	177753	83830.2	47.1611	2	2
196	Whiskey Jack Forest	Abitibi-Consolidated Company of Canada	North America	Canada	No	987198	83599.3	8.46835	27	11
197	PT.MANGOLE UNIT VI (PHONIX HARAPAN Tbr)	Unknown	Asia	Indonesia	No	165241	83178.2	50.3375	2	2
198	PT.MUKTI ARTHA YOGA a	Unknown	Asia	Indonesia	No	126839	83140.9	65.5482	6	5
199	Golden TSA Block B07B	Unknown	North America	Canada	No	115952	83041.7	71.6171	1	1
200	UMF I Paru	Unknown	South America	Brazil	Yes	100415	82371.9	82.0313	7	1
201	GAW-Ngounié	OLAM INTERNATIONAL	Africa	Gabon	No	364836	82034.8	22.4854	11	7
202	UMF II Caxiuana	Unknown	South America	Brazil	Yes	87120.3	81711.9	93.7921	2	2
203	TFL23b	Unknown	North America	Canada	No	216802	81668.8	37.6697	4	1
204	UAF 08665g	Unknown	North America	Canada	No	233018	81115.5	34.8109	17	7
205	SUNLY GABON Centre Sud	SUNLY GABON CENTRE SUD	Africa	Gabon	No	211226	80652.6	38.1831	8	4
206	001/11	LA FORESTIERE	Africa	Democratic Republic of Congo	No	116351	80392.2	69.0948	3	2
207	SCAD 171	SCAD	Africa	Central African Republic	No	478614	80233.2	16.7637	5	2
208	UAF 08663	Unknown	North America	Canada	No	335877	79949.3	23.8032	11	10
209	UAF 08664l	Unknown	North America	Canada	No	266187	79714.1	29.9466	18	7
210	Invermere TSA Block B09B	Unknown	North America	Canada	No	175848	79515	45.2181	4	4
211	Kispiox TSA Block F12Fb	Unknown	North America	Canada	No	87354.8	78889.2	90.3089	4	1
212	UAF 02551	Unknown	North America	Canada	No	463781	77979.1	16.8138	10	7
213	CFA/DLH	COMPAGNIE FORESTIERE DES ABEILLES	Africa	Gabon	No	316918	77906.3	24.5825	3	3
214	022/11	Unknown	Africa	Democratic Republic of Congo	No	96439.4	77739.8	80.61	2	1
215	PT.DAMAI SETIATAMA Tbr	Unknown	Asia	Indonesia	No	303471	77235.3	25.4506	4	2
216	Loumongongo	Unknown	Africa	Republic of Congo	No	284173	76562.2	26.9421	1	1
217	Golden TSA Block A07A	Unknown	North America	Canada	No	113711	76073.8	66.9008	5	4
218	McBride TSA Block I17I	Unknown	North America	Canada	No	144628	75857.2	52.4497	2	2
219	Golden TSA Block F07F	Unknown	North America	Canada	No	206395	75468.9	36.5653	3	2
220	TFL1d	Unknown	North America	Canada	No	147755	75090.3	50.8209	5	3
221	MONT PELE BOIS	TBNI	Africa	Gabon	No	250568	75070	29.9599	15	11
222	Flona Jatuarana UMF IV	Unknown	South America	Brazil	No	74372.8	74353.3	99.9739	1	1
223	014/11	Unknown	Africa	Democratic Republic of Congo	No	127751	73553.1	57.5754	1	1
224	TFL56	Unknown	North America	Canada	No	119493	73398	61.4245	8	2
225	TFL1f	Unknown	North America	Canada	No	94474.7	73370	77.6611	1	1
226	Bulkley TSA Block C03C	Unknown	North America	Canada	No	198622	72402.5	36.4525	11	5
227	010/11	Unknown	Africa	Democratic Republic of Congo	No	331657	71071.3	21.4292	1	1
228	CFAD Moyabi 2	ROUGIER GABON	Africa	Gabon	Yes	105897	71044.7	67.0887	4	2
229	CBPP (Licensed)r	Corner Brook Pulp and Paper Limited	North America	Canada	No	219128	70958.9	32.3823	5	4
230	ООО «Верхнетоемский леспромхоз»	Verhnetoemskiy LPH LLC	Eurasia	Russia	Yes	423950	70696.8	16.6757	4	4
231	51/14	Unknown	Africa	Democratic Republic of Congo	No	167774	70242.1	41.8672	1	1
232	Kingcome TSA Seymour Block33C	Unknown	North America	Canada	No	283152	69652	24.5988	3	3
233	09-002	Unknown	Africa	Cameroon	No	71623.4	69152.8	96.5505	2	1
234	Industrie Forestière de Lambaréné	IFL	Africa	Gabon	No	103862	69029.8	66.463	1	1
235	ООО "Азия Лес"	ООО УК "БМ Групп"	Eurasia	Russia	No	240034	68621.2	28.5881	8	6
236	Wms Lk TSA Junction Block29N	Unknown	North America	Canada	No	139743	68165.1	48.7787	7	6
237	Lake Nipigon Forest	Lake Nipigon Forest Management Inc.	North America	Canada	No	923135	68155.8	7.38309	9	6
238	N. Coast TSA Outer Coast Blk21Dab	Unknown	North America	Canada	No	86607.1	68062	78.5871	1	1
239	PT. KALTIM HUTAMA	Unknown	Asia	Indonesia	No	162237	67964.2	41.8919	10	4
240	UAF 02664m	Unknown	North America	Canada	No	542010	67963.7	12.5392	6	5
241	ООО "Лузалес" (Северная аренда)	Unknown	Eurasia	Russia	No	178870	67883.8	37.9513	11	7
242	Amana Limite UMF I	Unknown	South America	Brazil	No	83752.6	67823.4	80.9807	1	1
243	PT. SUMALINDO LESTARI JAYA TBK	Unknown	Asia	Indonesia	No	69384.9	67819.2	97.7434	2	1
244	Balata UMF VI	Unknown	South America	Brazil	No	78802.3	66554.1	84.457	1	1
245	Kalum TSA Block A10A	Unknown	North America	Canada	No	136492	66441.3	48.6777	5	3
246	Amana Limite UMF II	Unknown	South America	Brazil	No	106694	66360	62.1965	2	2
247	52b/14	SIFORCO (ex. SEDAF)	Africa	Democratic Republic of Congo	No	210970	65828.6	31.2028	3	2
248	020/11	Unknown	Africa	Democratic Republic of Congo	No	238242	65661.7	27.5609	2	2
249	Hearst Forest	Hearst Forest Management Inc.	North America	Canada	Yes	1.46205e+06	65129.8	4.4547	27	19
250	Bonvouki	Unknown	Africa	Republic of Congo	No	110121	64911.1	58.9454	6	5
251	CFAD CEB	CEB	Africa	Gabon	Yes	601072	64446.9	10.722	2	2
252	Sunsh Coast TSA Sechelt Block39Ba	Unknown	North America	Canada	No	341036	64113.1	18.7995	2	2
253	005/11	Unknown	Africa	Democratic Republic of Congo	No	129554	63486.4	49.0037	1	1
254	Cassiar TSA Block F04Fa	Unknown	North America	Canada	No	64397.5	63367.8	98.401	1	1
255	WAN CHUAN TIMBER SARL	Honest Timber	Africa	Gabon	No	95986.4	63186.1	65.8282	2	2
256	Queen Charlotte TSA Block B25Bg	Unknown	North America	Canada	No	171769	62818.5	36.5715	6	2
257	PT.CITRA LEMBAH KENCANA ( TUNGGAL YUDI UNIT IV) b	Unknown	Asia	Indonesia	No	69096.8	62424.8	90.344	2	2
258	Morice TSA Block C20Cb	Unknown	North America	Canada	No	415352	62075.1	14.9452	20	11
259	ОАО «Монди_СЛПК» (с)	Open Joint Stock Company Mondi Syktyvkar	Eurasia	Russia	Yes	1441633	61860.2	4.29098	31	17
260	Kenora Forest	Weyerhaeuser Company Ltd.	North America	Canada	No	1.12824e+06	61800.6	5.4776	7	3
261	Hum UMF II	Unknown	South America	Brazil	No	63393.7	61679.9	97.2965	2	2
262	Gleba Castanho UMF I	Unknown	South America	Brazil	No	68231.5	61631.7	90.3272	1	1
263	English River Forest	Bowater Canadian\Forest Products Inc.	North America	Canada	No	1.09295e+06	61371.6	5.61524	24	10
264	TFL14	Unknown	North America	Canada	No	150947	60631.5	40.1673	3	3
265	PT. KURNIATAMA SEJAHTERA	Unknown	Asia	Indonesia	No	114407	60583	52.9538	9	4
266	Compagnie Africaine d'Exploitation du Bois	CAEB	Africa	Gabon	No	68815.6	60218.1	87.5064	1	1
267	PAG07a	Unknown	North America	Canada	No	290515	59791.3	20.5812	11	2
268	UMF II Flona de Altamira	Unknown	South America	Brazil	Yes	112981	59676.9	52.8203	2	2
269	018/11	Unknown	Africa	Democratic Republic of Congo	No	265515	59609.7	22.4506	9	4
270	ООО «Карпогорылес»	Karpogoryles OOO	Eurasia	Russia	Yes	530607	59216	11.1601	15	8
271	PT.DIGUL DAYA SAKTI a	Unknown	Asia	Indonesia	No	106213	58837.3	55.3955	4	2
272	ООО «Группа компаний «УЛК» (ОП Плесецкий леспромхоз)	ULK Group LLC	Eurasia	Russia	Yes	685201	58439.2	8.52877	15	5
273	TC1 026041c	Unknown	North America	Canada	No	80015.6	58281	72.8371	2	1
274	ООО «Хенда-Сибирь»a	Henda-Siberia Co LTD	Eurasia	Russia	Yes	748960	58199.6	7.77073	16	11
275	ООО "Группа Компаний "УЛК" (ОП Плесецкий леспромхоз)	Unknown	Eurasia	Russia	No	703015	57890.7	8.23463	10	5
276	Kispiox TSA Block C12C	Unknown	North America	Canada	No	222364	57861.6	26.0211	6	4
277	Revelstoke TSA Block E27E	Unknown	North America	Canada	No	81559.9	57740.7	70.7954	8	5
278	OLAM Gabon Makokou	OLAM GABON Makokou	Africa	Gabon	No	155587	57373.2	36.8753	12	8
279	PT.WANA IRIAN PERKASA	Unknown	Asia	Indonesia	No	78259.5	57108.2	72.9729	7	5
280	UAF 02751k	Unknown	North America	Canada	No	1.19526e+06	56909.1	4.76124	11	6
281	Balata UMF III	Unknown	South America	Brazil	No	107266	56465	52.64	1	1
282	Bonus Harvest/CIPLAC	BONUS HARVEST/CIPLAC	Africa	Gabon	No	208522	56322.7	27.0104	1	1
283	UAF 02661w	Unknown	North America	Canada	No	171710	56071.5	32.6548	4	3
284	024/11	MOTEMA	Africa	Democratic Republic of Congo	No	182056	55805	30.6526	1	1
285	TTIB	Tropical Timber Industry Board	Africa	Gabon	No	138142	55801.1	40.3939	6	4
286	PD.Panca Karya	Unknown	Asia	Indonesia	No	118277	55735.2	47.1226	2	2
287	PT.KAMUNDAN RAYA	Unknown	Asia	Indonesia	No	196235	55733.1	28.4012	1	1
288	Revelstoke TSA Block Y27Y	Unknown	North America	Canada	No	87054.8	55619.7	63.8905	4	3
289	TFL25	Unknown	North America	Canada	No	64265.7	55587.4	86.4962	23	6
290	Wms Lk TSA Anahim Block29A	Unknown	North America	Canada	No	365781	55462.3	15.1627	20	14
291	10-028	Unknown	Africa	Cameroon	No	78544.2	55225.5	70.3114	2	2
292	10-032	Unknown	Africa	Cameroon	No	74962	54870	73.197	5	3
293	10-035	Unknown	Africa	Cameroon	No	78339.8	54500	69.5687	1	1
294	ООО "Хокинус"	ООО УК "БМ Групп"	Eurasia	Russia	No	166344	53870.3	32.3848	9	3
295	PT. BARITO NUSANTARA INDAH	Unknown	Asia	Indonesia	No	94624.4	53715.8	56.7674	9	6
296	PT.PAPUA SATYA KENCANA	Unknown	Asia	Indonesia	No	197243	53219.7	26.9818	3	2
297	North Coast TSA Stewart Block21A	Unknown	North America	Canada	No	69822	53107.2	76.0608	1	1
298	ООО «Красноярский Центр Строительства»	Krasnoyarskiy Centr Stroitelstva LLC	Eurasia	Russia	Yes	663557	52900	7.97219	28	8
299	Mobola mbondo	Unknown	Africa	Republic of Congo	No	110902	52868	47.6707	2	2
300	Dawson Creek TSA Block C41C	Unknown	North America	Canada	No	79389.1	52603.2	66.2599	9	4
301	Golden TSA Block E07E	Unknown	North America	Canada	No	109432	52353.1	47.8407	3	2
302	040/11	SIFORCO	Africa	Democratic Republic of Congo	No	197435	51585.6	26.1279	1	1
303	UMF III Crepori	Unknown	South America	Brazil	No	59910.6	51443.5	85.8672	1	1
304	PT.AKATHES PLYWOOD	Unknown	Asia	Indonesia	No	94197	51337.1	54.4997	17	8
305	TFL55	Unknown	North America	Canada	No	92655.7	50767	54.791	3	2
306	PAG02k	Unknown	North America	Canada	No	637051	50504.2	7.9278	9	7
307	PT.WANA GALANG UTAMA	Unknown	Asia	Indonesia	No	88749.6	50494.9	56.896	2	2
308	10-067	Unknown	Africa	Cameroon	No	51531.5	50232.4	97.4789	13	3
309	PAG13e	Unknown	North America	Canada	No	697786	49407.8	7.08065	10	6
310	PT.MARUWAI TIMBER (BARITO PASIFIC TIMBER IV) a	Unknown	Asia	Indonesia	No	96715.7	49054.7	50.7205	11	8
311	Balata UMF II	Unknown	South America	Brazil	No	58454.1	48669.5	83.2611	2	1
312	MacKenzie TSA Block E16Ec	Unknown	North America	Canada	No	48415.3	48415.3	100	1	1
313	TFL48e	Unknown	North America	Canada	No	278567	47756.8	17.1437	13	4
314	MacKenzie TSA Block K16Kb	Unknown	North America	Canada	No	74205.4	47696.5	64.2764	8	6
315	10-015	Unknown	Africa	Cameroon	No	130802	47333.6	36.1871	8	7
316	McBride TSA Block A17A	Unknown	North America	Canada	No	85937.4	47175.1	54.8947	2	2
317	IMENOU PLATEAU	IMENOU PLATEAU	Africa	Gabon	No	55094	46711.6	84.7852	2	2
318	Soo TSA Pemberton Block31C	Unknown	North America	Canada	No	187370	46559.3	24.8489	57	27
319	STBC 189	TIMBERLAND	Africa	Central African Republic	No	213303	46399.2	21.7527	10	1
320	PT.IRMASULINDO UNIT II	Unknown	Asia	Indonesia	No	72439.1	45291.7	62.5238	2	1
321	PT.WUKIRASARI	Unknown	Asia	Indonesia	No	152012	44974.3	29.586	3	3
322	TFL48b	Unknown	North America	Canada	No	190077	44905.5	23.6249	13	1
323	Northshore Forest	Northshore Forest Inc.	North America	Canada	Yes	1.10985e+06	44640.6	4.02221	5	2
324	CORA Wood LASSIO	CORA WOOD GABON	Africa	Gabon	No	218496	44422.3	20.331	4	2
325	PT. AQUILA SILVA	Unknown	Asia	Indonesia	No	55340.2	44403.1	80.2367	2	1
326	PT.Diadyani Timber	Unknown	Asia	Indonesia	No	206707	44389.6	21.4747	4	2
327	SNBG	SNBG	Africa	Gabon	No	44867.9	44241.8	98.6045	2	1
328	ПАО «ЛХК «Кареллеспром»	PAO LHK Karellesprom	Eurasia	Russia	Yes	740084	43242.1	5.84286	19	8
329	PT. PAPUA HUTAN LESTARI MAKMUR	Unknown	Asia	Indonesia	No	102817	42904.6	41.729	14	13
330	Temagami Forest	Temagami Management Unit	North America	Canada	No	497445	42584.7	8.56069	35	11
331	09-012	Unknown	Africa	Cameroon	No	64222.2	42560.5	66.2706	1	1
332	UAF 02661m	Unknown	North America	Canada	No	506319	41856.6	8.26683	3	2
333	UMF III Paru	Unknown	South America	Brazil	No	42181	41347.4	98.0239	1	1
334	АО "Монди СЛПК"b	Unknown	Eurasia	Russia	No	1315864	41205.5	3.13144	24	12
335	08-002	Unknown	Africa	Cameroon	No	60783.8	41081.9	67.5868	3	1
336	UMF V Paru	Unknown	South America	Brazil	No	41908.4	41063.2	97.9832	1	1
337	62/14	SODEFOR	Africa	Democratic Republic of Congo	No	74297.3	40914.2	55.0682	5	1
338	Cranbrook TSA Block A05A	Unknown	North America	Canada	No	187327	40812.9	21.7869	5	5
339	N. Coast TSA Outer Coast Blk21Daa	Unknown	North America	Canada	No	60815.2	40663	66.8631	2	2
340	PT.CIVIKA WANA LESTARI (Eks DAMUKTI)	Unknown	Asia	Indonesia	No	74810.1	40453	54.0743	4	3
341	UMF III a Flona de Altamira	Unknown	South America	Brazil	Yes	83568.8	40403.5	48.3476	2	2
342	00-004	Unknown	Africa	Cameroon	No	95896.6	40098.2	41.814	2	2
343	PT.HANURATA COY LTD (SORONG) b	Unknown	Asia	Indonesia	No	74628	40066.1	53.6878	1	1
344	Flona Jatuarana UMF III	Unknown	South America	Brazil	No	39917.6	39846.7	99.8224	1	1
345	Gleba Castanho UMF III	Unknown	South America	Brazil	No	43694.2	39447.4	90.2805	2	1
346	TFL23a	Unknown	North America	Canada	No	77138.6	39432.2	51.1186	9	3
347	GMDCe	GMDC	Africa	Gabon	No	49421.9	39343.6	79.6075	3	1
348	PT.Karya Jaya Berdikari a	Unknown	Asia	Indonesia	No	64365.3	39244.2	60.971	1	1
349	Société Taurian Ressource Gabon	TAURIAN	Africa	Gabon	No	50677.2	39224.8	77.4012	2	1
350	Prince George TSA Block G24G	Unknown	North America	Canada	No	499777	39165	7.83649	2	2
351	Flona Pau-Rosa UMF I	Unknown	South America	Brazil	No	39825.3	38627.6	96.9926	1	1
352	Okanagan TSA Block 822H	Unknown	North America	Canada	No	213022	38482.9	18.0652	7	5
353	Mitzic Exploitation Forestière	MEF	Africa	Gabon	No	68904.1	38477.4	55.842	5	2
354	PT.HANURATA COY LTD (SORONG) a	Unknown	Asia	Indonesia	No	81735.7	38018.4	46.5138	8	6
355	T/0412 Samling Plywood (Baramas)	Samling	Asia	Malaysia	No	102789	37887.1	36.8589	4	1
356	039/11	SODEFOR	Africa	Democratic Republic of Congo	No	242330	37876.5	15.6301	2	2
357	PT.SATRIA YUDA WANABAKTI	Unknown	Asia	Indonesia	No	79590.6	37863.6	47.5729	5	4
358	Société Import Export Bois	SIEB	Africa	Gabon	No	73919.7	37820.3	51.1641	8	4
359	Invermere TSA Block G09G	Unknown	North America	Canada	No	167950	37786.9	22.4989	10	7
360	Wms Lk TSA Tatla Block29Cc	Unknown	North America	Canada	No	374154	37037.8	9.89906	12	9
361	PT.ALAS TIRTA KENCANA	Unknown	Asia	Indonesia	No	91719.1	37005.9	40.347	1	1
362	Mid-Coast TSA Block E19E	Unknown	North America	Canada	No	75873	36824.6	48.5346	2	2
363	PT.MUKTI ARTHA YOGA b	Unknown	Asia	Indonesia	No	42856.5	36580.8	85.3564	2	2
364	MacKenzie TSA Block L16L	Unknown	North America	Canada	No	205108	36433.8	17.7632	7	4
365	PT.IRMASULINDO	Unknown	Asia	Indonesia	No	100010	36173.1	36.1696	4	4
366	Hum UMF I	Unknown	South America	Brazil	No	38235.7	35769.3	93.5495	1	1
367	Wms Lk TSA Upper Horsefly Blk29M	Unknown	North America	Canada	No	177331	35454.3	19.9933	2	1
368	PAG16f	Unknown	North America	Canada	No	261186	35449.3	13.5725	1	1
369	Revelstoke TSA Block W27W	Unknown	North America	Canada	No	44711.5	35420.3	79.2197	1	1
370	Balata UMF I	Unknown	South America	Brazil	No	38632.8	35090.8	90.8317	2	1
371	Morice TSA Block A20Ad	Unknown	North America	Canada	No	34835	34835	100	1	1
372	UAF 08562g	Unknown	North America	Canada	No	72154.6	34797.9	48.2268	4	3
373	ООО «Ваеньгский леспромхоз»	Vaengskiy Lespromhoz OOO	Eurasia	Russia	Yes	229934	34740	15.1087	6	3
374	MUTIARA KALJA PERMAI a	Unknown	Asia	Indonesia	No	53750.8	34705	64.5664	4	3
375	PT.MULTI WAHANA WIJAYA	Unknown	Asia	Indonesia	No	134954	34636.7	25.6656	6	5
376	Gleba Castanho UMF II	Unknown	South America	Brazil	No	39039.1	34399.1	88.1146	1	1
377	K2T 2 SCHEDULE_B	VALEMOUNT COMMUNITY FOREST COMPANY LTD.	North America	Canada	No	47958	34299.2	71.5193	9	1
378	PAG05a	Unknown	North America	Canada	No	34210.1	34210.1	100	1	1
379	UAF 09551d	Unknown	North America	Canada	No	39929.4	34109.4	85.4243	2	1
380	Revelstoke TSA Block F27F	Unknown	North America	Canada	No	71133.4	34008.1	47.8088	3	3
381	Cassiar TSA Block F04Fb	Unknown	North America	Canada	No	33871.2	33871.2	100	1	1
382	Invermere TSA Block D09D	Unknown	North America	Canada	No	128800	33544.3	26.0438	6	5
383	PT. INTISIXTA a	Unknown	Asia	Indonesia	No	196605	33537.8	17.0585	11	8
384	Red Lake Forest	Red Lake Forest Management Company Ltd.	North America	Canada	No	286681	33420.3	11.6577	10	6
385	BSO Ogooué Ndjolé	Bois et Sciérie de l'Ogooué	Africa	Gabon	No	182216	33366.4	18.3114	3	2
386	Okanagan TSA Block 522E	Unknown	North America	Canada	No	389986	33095.1	8.48621	10	6
387	Fraser TSA Nahatlatch Block30E	Unknown	North America	Canada	No	228836	33075	14.4536	3	3
388	K3K 2 SCHEDULE_B	BELLA COOLA RESOURCE SOCIETY	North America	Canada	No	45190.4	32863	72.7213	3	2
389	UMF I Caxiuana	Unknown	South America	Brazil	Yes	37390.7	32478.7	86.8632	1	1
390	Quesnel TSA South Kluskus Blk26Aa	Unknown	North America	Canada	No	137635	32423.7	23.5578	1	1
391	PT.MARAGADAYA WOOD WORK a	Unknown	Asia	Indonesia	No	45548.5	32124.6	70.5284	1	1
392	Lopola	Unknown	Africa	Republic of Congo	No	198738	31923.9	16.0633	2	2
393	Mapati	SIPAM	Africa	Republic of Congo	No	152843	31788.9	20.7984	4	2
394	UMF I Flona de Altamira	Unknown	South America	Brazil	Yes	39051.5	31705	81.1877	1	1
395	Kalum TSA Block B10Bb	Unknown	North America	Canada	No	118827	31434.1	26.4536	6	3
396	UMF 1B Saraca-Taquera	Unknown	South America	Brazil	Yes	59454.9	31419.5	52.846	4	4
397	PT.WANA KAYU HASILINDO	Unknown	Asia	Indonesia	No	203573	31260.5	15.3559	7	2
398	Gordon Cosens Forest	Tembec Enterprises Inc.	North America	Canada	No	1.85519e+06	31224.8	1.6831	11	5
399	PT. KAWEDAR WOOD INDUSTRY	Unknown	Asia	Indonesia	No	58834.3	31037.5	52.7541	9	5
400	PT.DAYA SAKTI KRIDA UNGGUL a	Unknown	Asia	Indonesia	No	32478.1	30670.4	94.4341	1	1
401	10-036	Unknown	Africa	Cameroon	No	56793.7	30262.2	53.2844	5	1
402	Amana Limite UMF III	Unknown	South America	Brazil	No	39021.5	30208.4	77.4147	1	1
403	004/11	Unknown	Africa	Democratic Republic of Congo	No	198378	30180.6	15.2137	3	2
404	PT.SATYA SENA INDRATAMA	Unknown	Asia	Indonesia	No	65340.3	29899.7	45.76	4	2
405	PT. MIJARAYA SEMBADA a	Unknown	Asia	Indonesia	No	33214.6	29729.4	89.5069	1	1
406	NGOYLA	Unknown	Africa	Cameroon	No	36148.6	29687.9	82.1274	2	2
407	K3K 1 SCHEDULE_B	BELLA COOLA RESOURCE SOCIETY	North America	Canada	No	35053.2	29512.8	84.1944	1	1
408	MacKenzie TSA Block K16Kh	Unknown	North America	Canada	No	47342.6	29498.6	62.3089	3	2
409	PAG02g	Unknown	North America	Canada	No	174824	29327.8	16.7756	2	2
410	Lillooet TSA Block 215B	Unknown	North America	Canada	No	174822	29327.5	16.7757	2	2
411	ООО «Красноборск-лес»	Krasnoborsk-les OOO	Eurasia	Russia	Yes	90969	28910.5	31.7806	8	5
412	MINTOM	Unknown	Africa	Cameroon	No	41843.5	28761.2	68.7351	17	1
413	043/11	Unknown	Africa	Democratic Republic of Congo	No	154553	28720.7	18.583	2	1
414	K2Z 1 SCHEDULE_B	ENIYUD COMMUNITY FORESTS LTD.	North America	Canada	No	114583	28292.3	24.6916	18	7
415	Revelstoke TSA Block A27A	Unknown	North America	Canada	No	37645.4	28273.7	75.1052	2	2
416	ООО «Русфорест Магистральный»	Rusforest Magistralniy LLC	Eurasia	Russia	Yes	626807	28161.2	4.4928	7	5
417	Kootenay Lake TSA Block D13D	Unknown	North America	Canada	No	125646	28098.3	22.363	3	1
418	N. Coast TSA Outer Coast Blk21Dad	Unknown	North America	Canada	No	54122.6	27946.9	51.6363	4	3
419	TFL25c	Unknown	North America	Canada	No	58772.3	27845	47.3778	5	2
420	ООО «Бобровское»	Bobrovskoye LLC	Eurasia	Russia	Yes	132602	27817.4	20.9781	4	2
421	12G	Unknown	North America	Canada	No	76165.2	27681.8	36.3444	2	2
422	North Coast TSA Skeena Block21Cu	Unknown	North America	Canada	No	34878.5	27540	78.9597	1	1
423	McBride TSA Block F17F	Unknown	North America	Canada	No	39021.1	27086.2	69.4142	3	3
424	Revelstoke TSA Block D27D	Unknown	North America	Canada	No	51448.3	26997.2	52.4745	5	4
425	FMU 09-003a	LOREMA	Africa	Cameroon	Yes	109764	26375.1	24.029	34	3
426	GSEZW-Lambaréné Lacs	OLAM INTERNATIONAL	Africa	Gabon	No	358916	25999.4	7.24388	5	2
427	Bordamur/Toujours Vert	BORDAMUR TOUJOURS VERT	Africa	Gabon	No	268164	25960.9	9.68098	14	11
428	PAG16g	Unknown	North America	Canada	No	1.17834e+06	25940.4	2.20144	3	2
429	PT.HARAPAN KITA UTAMA a	Unknown	Asia	Indonesia	No	34577.9	25918.5	74.957	3	3
430	Bulkley TSA Block B03B	Unknown	North America	Canada	No	199935	25843.6	12.926	1	1
431	Lakes TSA Block G14Gc	Unknown	North America	Canada	No	259237	25800.4	9.95246	40	2
432	PT.Global Partners Indonesia	Unknown	Asia	Indonesia	No	143086	25798.9	18.0304	1	1
433	TFL57e	Unknown	North America	Canada	No	64887.6	25688.3	39.5889	4	3
434	Timiskaming Forest	Timiskaming Forest Alliance Inc.	North America	Canada	Yes	1.46944e+06	25643.8	1.74514	5	3
435	PT.TAMAN RAJA PERSADA	Unknown	Asia	Indonesia	No	53227.6	25530.6	47.9649	3	1
436	North Coast TSA Skeena Block21Ct	Unknown	North America	Canada	No	44261.9	25358.9	57.2928	1	1
437	Invermere TSA Block A09Aa	Unknown	North America	Canada	No	50677.9	25212.4	49.7503	3	3
438	Bois et Scierie de l'Ogooué Mitzic-Nord	BSO	Africa	Gabon	No	141341	25071.1	17.738	3	3
439	FMU 11-005	CAFECO	Africa	Cameroon	Yes	81579.1	25024.9	30.6756	4	3
440	MBAZOGHE M	MBAZOGHE M	Africa	Gabon	No	27319.9	24605.9	90.0658	7	2
441	CBPP (Licensed)ao	Corner Brook Pulp and Paper Limited	North America	Canada	No	26780.8	24282.4	90.6709	2	2
442	Sunsh Coast TSA Powell R. Blk39Ct	Unknown	North America	Canada	No	24251.7	24251.7	100	1	1
443	T/0390 Merawa	Samling	Asia	Malaysia	No	113695	24245.4	21.325	11	4
444	PT.KUSUMA ATLAS TIMBER a	Unknown	Asia	Indonesia	No	30114.7	24089.2	79.9915	3	2
445	UFA Kabo	CIB-OLAM	Africa	Republic of Congo	Yes	294035	24004.1	8.16369	3	2
446	K3K 3 SCHEDULE_B	BELLA COOLA RESOURCE SOCIETY	North America	Canada	No	24784.9	23383.1	94.344	1	1
447	UMF VII Paru	Unknown	South America	Brazil	No	24933.6	23211.7	93.0942	1	1
448	Exploitation Forestière de Moanda	SSMO	Africa	Gabon	No	216028	23204.6	10.7415	7	5
449	Weyerhaeuser Company Limited (Grande Prairie)	Weyerhaeuser Company Limited (Grande Prairie)	North America	Canada	No	906722	23141.2	2.55219	6	4
450	PT.BATU KARANG SAKTI	Unknown	Asia	Indonesia	No	47235.5	23041.7	48.7804	10	6
451	MUNDEMBA	Unknown	Africa	Cameroon	No	23809.6	23034.2	96.7434	3	3
452	АО "Приморсклеспром"	Unknown	Eurasia	Russia	No	199196	22851.8	11.472	4	4
453	UMF III Caxiuana	Unknown	South America	Brazil	Yes	53321.2	22628.6	42.4382	2	2
454	Soo TSA Port Douglas Block31B	Unknown	North America	Canada	No	85013.7	22275	26.2017	21	11
455	Wms Lk TSA Kloacut Block29Ea	Unknown	North America	Canada	No	137776	22166.4	16.0888	13	6
456	T/0413 Samling Plywood (Miri)	Samling	Asia	Malaysia	No	206479	21970.2	10.6404	5	2
457	PT.BUDHI NYATA a	Unknown	Asia	Indonesia	No	53639.9	21663.6	40.3871	6	5
458	08-007	Unknown	Africa	Cameroon	No	34126.6	21447.4	62.8465	1	1
459	UAF 08551	Unknown	North America	Canada	No	991722	21413.3	2.1592	11	6
460	PT.WANA RIMBA KENCANA	Unknown	Asia	Indonesia	No	69853.4	21263.5	30.4402	7	5
461	10-027	Unknown	Africa	Cameroon	No	32107.3	21239	66.15	8	2
462	SBL/TRB	Société des Bois de Lastourville/ Transbois	Africa	Gabon	No	327601	20930.1	6.38889	2	2
463	GAW/GSEZW-HO/OI	OLAM INTERNATIONAL	Africa	Gabon	No	216095	20858.1	9.65229	4	2
464	UMF IX Paru	Unknown	South America	Brazil	No	24270	20815.2	85.765	1	1
465	Dawson Creek TSA Block A41Ab	Unknown	North America	Canada	No	27993.8	20782	74.2381	3	3
466	PT.CENTRICO a	Unknown	Asia	Indonesia	No	66145	20673.9	31.2555	5	4
467	Massanga	ASIA CONGO INDUSTRIE	Africa	Republic of Congo	No	326058	20626.2	6.32592	17	9
468	10-047A	Unknown	Africa	Cameroon	No	51996.4	20360.5	39.1575	3	1
469	RFC 095023	Unknown	North America	Canada	No	30872	20240.5	65.5626	5	2
470	АО "Монди СЛПК"a	Unknown	Eurasia	Russia	No	85101.6	20175.9	23.708	5	3
471	PT.MITRA PERDANA PALANGKA	Unknown	Asia	Indonesia	No	56417.9	20130.6	35.6812	3	3
472	PT. KEMAKMURAN BERKAH TIMBER	Unknown	Asia	Indonesia	Yes	89193.6	19997.3	22.4201	7	5
473	PT.MARAGADAYA WOOD WORK b	Unknown	Asia	Indonesia	No	19589.1	19589.1	100	2	1
474	TFL25b	Unknown	North America	Canada	No	25999.9	19561.5	75.2369	14	7
475	UAF 09352n	Unknown	North America	Canada	No	25235.6	19216.3	76.1476	1	1
476	MAKENENE	Unknown	Africa	Cameroon	No	20258.7	19161.2	94.5828	1	1
477	PT.WANGSA KARYA LESTARI	Unknown	Asia	Indonesia	No	21016.9	19115.6	90.9534	1	1
478	Mid-Coast TSA Block B19Bh	Unknown	North America	Canada	No	52202.2	19039.7	36.473	1	1
479	PT.MENORAH LOGGINGINDO	Unknown	Asia	Indonesia	No	55924.3	18820.9	33.6543	10	6
480	PT.SALAKI MANDIRI SEJAHTERA	Unknown	Asia	Indonesia	No	85550.6	18424.6	21.5365	9	8
481	T/3343 STIDC (Solid Harta Bina)	STIDC / Sarawak Foundation	Asia	Malaysia	No	127240	18405.7	14.4654	20	4
482	Sudbury Forest	The Vermilion Forest Management Company Lt	North America	Canada	Yes	953840	18394.4	1.92846	10	5
483	UAF 09452b	Unknown	North America	Canada	No	28044.6	18379.2	65.5354	1	1
484	PT.MARUWAI TIMBER (BARITO PASIFIC TIMBER IV) b	Unknown	Asia	Indonesia	No	18277.6	18181.6	99.4749	2	2
485	CBPP (Licensed)aj	Corner Brook Pulp and Paper Limited	North America	Canada	No	107928	17999.3	16.6772	2	1
486	UAF 03152d	Unknown	North America	Canada	No	149034	17991.6	12.0721	1	1
487	TFL1a	Unknown	North America	Canada	No	26291.7	17658.8	67.1648	2	1
488	T/9082 SIF Management	Samling	Asia	Malaysia	No	78468.6	17584.3	22.4094	9	2
489	PT.BATASAN b	Unknown	Asia	Indonesia	No	17538.1	17538.1	100	1	1
490	K3H 9 SCHEDULE_B	NUXALK FORESTRY LIMITED PARTNERSHIP	North America	Canada	No	20606.8	17531.6	85.0768	1	1
491	McBride TSA Block G17G	Unknown	North America	Canada	No	36286.4	17510.9	48.2573	6	2
492	PT.MANOKWARI MANDIRI LESTARI	Unknown	Asia	Indonesia	No	85708	17474.6	20.3885	1	1
493	Kispiox TSA Block F12Fa	Unknown	North America	Canada	No	44171.8	17400.6	39.3931	4	3
494	Superior Forest	Tembec Industries Inc.	North America	Canada	No	1.05544e+06	17251.4	1.63452	15	7
495	McBride TSA Block D17D	Unknown	North America	Canada	No	35289.2	17208.6	48.7646	2	1
496	10-008	Unknown	Africa	Cameroon	No	73454.6	17196.6	23.4111	4	1
497	ООО «Магистраль-Транзит»	MAGISTRAL TRANSIT LLC	Eurasia	Russia	Yes	268772	17095.3	6.36055	7	6
498	PT.Arfak Indra	Unknown	Asia	Indonesia	No	177419	17064.5	9.61817	6	5
499	PT.RATU MIRI	Unknown	Asia	Indonesia	No	35479.1	17038.2	48.0233	3	3
500	IFB 169	IFB	Africa	Central African Republic	No	188275	16845.5	8.94729	2	2
501	SINFOCAM 190	STBC	Africa	Central African Republic	No	236976	16706.5	7.04985	16	3
502	SUMALINDO LESTARI JAYA V a	Unknown	Asia	Indonesia	No	17015.8	16692.7	98.1014	2	1
503	09-013	Unknown	Africa	Cameroon	No	42699.7	16625.4	38.9356	2	2
504	Amindo Wana Persada	Unknown	Asia	Indonesia	No	46378.3	16442.1	35.4522	7	4
505	PT.TAIWI III./	Unknown	Asia	Indonesia	No	48740.1	16438.5	33.7267	7	4
506	UMF 1A Saraca-Taquera	Unknown	South America	Brazil	No	26917.9	16435.1	61.0565	1	1
507	PT.INTRACA WOOD IND	Unknown	Asia	Indonesia	Yes	193628	16399.7	8.4697	4	3
508	ООО «Сургутмебель»	Surgutmebel LLC	Eurasia	Russia	Yes	117418	16350.5	13.925	6	5
509	McBride TSA Block E17E	Unknown	North America	Canada	No	31173.8	16334.5	52.3982	6	2
510	UAF 09751c	Unknown	North America	Canada	No	1.39601e+06	16234.7	1.16293	3	2
511	CORA Wood	CORA WOOD GABON	Africa	Gabon	No	153646	16228.1	10.562	6	3
512	PT.ADITYA KIRANA MANDIRI	Unknown	Asia	Indonesia	No	37728.5	16216.9	42.983	9	4
513	ООО "Римбунан Хиджау МДФ"	Unknown	Eurasia	Russia	No	835318	16104.9	1.92799	8	4
514	PT.Prima Bumi Sakti	Unknown	Asia	Indonesia	No	43761.7	15993.5	36.5469	12	8
515	Kingcome TSA Broughton Block33Dt	Unknown	North America	Canada	No	55469.7	15510.8	27.9626	3	3
516	Mambili	Unknown	Africa	Republic of Congo	No	140670	15443.5	10.9785	2	2
517	PT.INHUTANI I (UNIT KUNYIT-SIMENDURUT)	Unknown	Asia	Indonesia	No	51707.3	15431.9	29.8446	6	5
518	10-020	Unknown	Africa	Cameroon	No	83143.1	15283.3	18.382	1	1
519	Dawson Creek TSA Block A41Aa	Unknown	North America	Canada	No	15208.3	15208.3	100	1	1
520	GIW-Estuaire	OLAM INTERNATIONAL	Africa	Gabon	No	84663.8	15206.1	17.9606	4	2
521	PT. TUNGGAL AGATHIS a	Unknown	Asia	Indonesia	No	42390	15106.1	35.6361	1	0
522	FMU 09-005b	LOREMA	Africa	Cameroon	Yes	43210.5	15089	34.9197	1	1
523	KOUMBA Veronique (a)	KOUMBA Veronique	Africa	Gabon	No	14922.6	14922.6	100	2	1
524	CFAD Haut-Abanga	ROUGIER GABON	Africa	Gabon	Yes	290462	14916.8	5.13554	2	2
525	PT.INHUTANI I (PANGEAN)	Unknown	Asia	Indonesia	No	50698.1	14909.1	29.4076	9	7
526	TFL48g	Unknown	North America	Canada	No	32007.9	14899.6	46.5496	6	1
527	Fraser TSA Harrison Block30C	Unknown	North America	Canada	No	195480	14816.5	7.57955	2	2
528	UMF III b Flona de Altamira	Unknown	South America	Brazil	Yes	14816.2	14723.2	99.3719	1	1
529	PT. MITRA PEMBANGUNAN GLOBAL	Unknown	Asia	Indonesia	No	83297.2	14601	17.5288	6	1
530	Quesnel TSA South Kluskus Blk26Ab	Unknown	North America	Canada	No	21079.3	14437.2	68.4898	4	2
531	PT.RODAMAS Tbr KALIMANTAN	Unknown	Asia	Indonesia	Yes	18214.2	14347.1	78.7687	2	2
532	Fort St John TSA Block B40B	Unknown	North America	Canada	No	486379	14346.5	2.94965	7	4
533	TFL39b	Unknown	North America	Canada	No	140272	14259.5	10.1656	2	2
534	Betou	Unknown	Africa	Republic of Congo	No	340048	14252.3	4.19127	1	1
535	UMF III Mamuru	Unknown	South America	Brazil	No	85864.2	14204.9	16.5435	2	1
536	CFAD Rabi	COMPAGNIE DES BOIS DU GABON	Africa	Gabon	Yes	186214	14162.6	7.60557	7	3
537	035/11	Unknown	Africa	Democratic Republic of Congo	No	203021	14135.6	6.96263	3	3
538	ООО «Двинлеспром»	Dvinlesprom OOO	Eurasia	Russia	Yes	217754	14086.5	6.46902	4	3
539	АО «Лендерский ЛПХ» (бывш. АО «Муезерский леспромхоз»)	Lenderskiy lespromkhoz JSС	Eurasia	Russia	Yes	420212	14082.5	3.3513	1	1
540	PT. MIJARAYA SEMBADA b	Unknown	Asia	Indonesia	No	15557.4	14062	90.3879	1	1
541	CBPP (Licensed)an	Corner Brook Pulp and Paper Limited	North America	Canada	No	461804	14009.1	3.03355	4	3
542	Mid-Coast TSA Block B19Bj	Unknown	North America	Canada	No	16419	14004.3	85.2931	2	1
543	UMF VIII Paru	Unknown	South America	Brazil	No	24931	13823.5	55.4472	3	3
544	West Fraser Mills Ltd. (Hinton)	West Fraser Mills Ltd. (Hinton)	North America	Canada	Yes	989636	13747.8	1.38918	18	9
545	PT.CARUS INDONESIA	Unknown	Asia	Indonesia	Yes	72068.7	13734.7	19.0579	13	5
546	NDIKINIMEKI	Unknown	Africa	Cameroon	No	20438.2	13617.1	66.6257	3	2
547	Kingcome TSA Broughton Block33De	Unknown	North America	Canada	No	18862.6	13571.1	71.9475	1	1
548	Kootenay Lake TSA Block B13B	Unknown	North America	Canada	No	96745.1	13130.5	13.5722	13	5
549	ООО «РИТМ»	RITM LLC	Eurasia	Russia	Yes	216625	13084.7	6.04024	2	2
550	BOUKOUBI Faustin	BOUKOUBI Faustin	Africa	Gabon	No	14353.2	12963.9	90.3206	2	1
551	OVENG	Unknown	Africa	Cameroon	No	14693.2	12943.7	88.093	2	1
552	PT. SEROJA UNIVERSUM NARWASTU	Unknown	Asia	Indonesia	No	36495.9	12918	35.3957	4	3
553	Nyanga	CIBN	Africa	Republic of Congo	No	592642	12769.5	2.15467	5	4
554	Prince George TSA Block D24D	Unknown	North America	Canada	No	1.27788e+06	12759.2	0.998467	2	2
555	Moungouma	ETBM Sarl	Africa	Republic of Congo	No	31460.9	12732.5	40.4709	5	4
556	BOFIGA	BOFIGA	Africa	Gabon	No	26157.2	12691.4	48.5196	4	3
557	ООО «ЭКВАНТ»	Ekvant LLC	Eurasia	Russia	Yes	185972	12545.8	6.74606	3	3
558	MBOUROU André	MBOUROU André	Africa	Gabon	No	15103.9	12416.4	82.2066	1	1
559	PT.SARI BUMI KUSUMA	Unknown	Asia	Indonesia	Yes	74626.3	12409.9	16.6294	7	3
560	PT. TIAR BUNGIN ELOK b	Unknown	Asia	Indonesia	No	19543.4	12349.8	63.1915	2	2
561	Mid-Coast TSA Block B19Bi	Unknown	North America	Canada	No	35263.9	12234.6	34.6944	3	2
562	PT.WAPOGA MUTIARA TIMBER UNIT I	Unknown	Asia	Indonesia	No	201869	12128.1	6.0079	3	3
563	TFL48a	Unknown	North America	Canada	No	94263	12122.7	12.8605	4	2
564	MANGONGO NZAMBI	MANGONGO NZAMBI	Africa	Gabon	No	30798.9	12077.1	39.2128	4	2
565	Okanagan TSA Block 922I	Unknown	North America	Canada	No	204429	12021.2	5.88036	2	2
566	NIDA Marthe	NIDA Marthe	Africa	Gabon	No	12300.3	12005.2	97.6006	4	1
567	PT.SAGINDO SARI LESTARI I a	Unknown	Asia	Indonesia	No	26014.8	11997.3	46.1173	1	1
568	TC1 026041d	Unknown	North America	Canada	No	58370.1	11987.2	20.5365	4	3
569	PT.KAYU ARA JAYA RAYA	Unknown	Asia	Indonesia	No	87919	11921.5	13.5597	2	2
570	PT. INHUTANI II	Unknown	Asia	Indonesia	No	71078.5	11856.1	16.6803	6	3
571	K3K 5 SCHEDULE_B	BELLA COOLA RESOURCE SOCIETY	North America	Canada	No	14249.4	11573	81.2179	3	1
572	FML-3	LP Canada Ltd.	North America	Canada	No	2.53356e+06	11398.5	0.449901	1	1
573	Sunsh Coast TSA Powell R. Blk39Ca	Unknown	North America	Canada	No	14941	11360.8	76.0375	1	1
574	CFAD Moyabi 1	ROUGIER GABON	Africa	Gabon	Yes	90073.3	11322.2	12.57	1	1
575	K2T 1 SCHEDULE_B	VALEMOUNT COMMUNITY FOREST COMPANY LTD.	North America	Canada	No	23503.8	11308.4	48.1132	5	2
576	White River Forest	Domtar Inc.	North America	Canada	Yes	583391	11219	1.92307	8	4
577	PT. SUMALINDO LESTARI JAYA IV	Unknown	Asia	Indonesia	Yes	63063	11167	17.7077	5	2
578	10-018	Unknown	Africa	Cameroon	No	81747.3	11123.1	13.6066	11	5
579	Spray Lake Sawmills (1980) Ltd.	Spray Lake Sawmills (1980) Ltd.	North America	Canada	No	122747	11092.4	9.03678	5	4
580	UAF 02351c	Unknown	North America	Canada	No	272589	11089.2	4.06811	5	4
581	PT. RIMBA MAKMUR SENTOSA	Unknown	Asia	Indonesia	No	39589.8	11070.3	27.9625	4	4
582	TFL54k	Unknown	North America	Canada	No	21159.2	10873.9	51.3907	5	2
583	PT.RAJA GARUDA MAS LESTARI	Unknown	Asia	Indonesia	No	94084.7	10826.2	11.5069	7	3
584	CFAD Ogooué Ivindo	ROUGIER GABON	Africa	Gabon	Yes	279426	10711.6	3.83344	13	7
585	CBPP (Licensed)b	Corner Brook Pulp and Paper Limited	North America	Canada	No	10778.4	10631.7	98.6394	1	1
586	PT.KALHOLD c	Unknown	Asia	Indonesia	No	16100.3	10539.4	65.4608	2	2
587	Wabigoon Forest	Domtar Pulp and Paper Products Inc.	North America	Canada	Yes	685481	10486.9	1.52987	3	3
588	UAF 09452o	Unknown	North America	Canada	No	12767.8	10418.5	81.5999	1	1
589	North Coast TSA Skeena Block21Cw	Unknown	North America	Canada	No	15455.3	10416.1	67.3946	1	1
590	PT.SULWOOD EKSPORT DEVELOPMENT	Unknown	Asia	Indonesia	No	51582.2	10407.6	20.1767	1	1
591	TFL39f	Unknown	North America	Canada	No	46403.9	10345.3	22.294	1	1
592	MacKenzie TSA Block M16M	Unknown	North America	Canada	No	179916	10299.1	5.72441	5	4
593	ОАО «Рощинский КЛПХ»	JSC Roschino KLPH	Eurasia	Russia	Yes	470837	10280.2	2.18339	5	4
594	K3V 1 SCHEDULE_B	CHEAKAMUS COMMUNITY FOREST LIMITED PARTNERSHIP.	North America	Canada	No	32994.4	10217.5	30.9673	23	10
595	PT.KARYA WIJAYA SUKSES	Unknown	Asia	Indonesia	No	22448.3	10155.5	45.2397	3	1
596	KOUMBA Veronique (b)	KOUMBA Veronique	Africa	Gabon	No	10143.6	10143.6	100	1	1
597	PT.FORTUNA CIPTA SEJAHTERA a	Unknown	Asia	Indonesia	No	22983.9	10103.3	43.9581	4	3
598	PT. RANTE MARIO	Unknown	Asia	Indonesia	No	83938.8	9940.18	11.8422	4	3
599	PT.ALAS ACEH PERKASA	Unknown	Asia	Indonesia	No	26268.7	9918.73	37.7588	2	1
600	Tsama-mbama	Entreprise Christelle	Africa	Republic of Congo	No	587132	9826.07	1.67357	2	2
601	UAF 02662	Unknown	North America	Canada	No	320305	9653.48	3.01384	2	1
602	Soo TSA Squamish Block31A	Unknown	North America	Canada	No	140024	9618.61	6.86927	51	17
603	CBPP (Licensed)p	Corner Brook Pulp and Paper Limited	North America	Canada	No	17284.3	9550.83	55.2572	2	2
604	Dawson Creek TSA Block D41Dd	Unknown	North America	Canada	No	950197	9468.56	0.996484	2	2
605	GMDCc	GMDC	Africa	Gabon	No	35491.1	9288.08	26.1702	2	1
606	PT. Nusa Padma Corporation	Unknown	Asia	Indonesia	No	39305.2	9158.88	23.302	3	1
607	Boundary TSA Block G02G	Unknown	North America	Canada	No	88022.9	9078.44	10.3137	5	5
608	PT.HUMA SULUT LESTARI	Unknown	Asia	Indonesia	No	26390.5	9052.04	34.3003	6	6
609	Rain Forest Management	RFM	Africa	Gabon	No	83064.4	9035.83	10.8781	4	2
610	PT.PEMANTANG ABADITAMA	Unknown	Asia	Indonesia	No	54554.2	8902.54	16.3187	1	1
611	Kalum TSA Block B10Ba	Unknown	North America	Canada	No	9662.38	8892.25	92.0296	1	1
612	PT.JATI DHARMA INDAH	Unknown	Asia	Indonesia	No	211775	8882.75	4.19443	8	3
613	PT.BATASAN c	Unknown	Asia	Indonesia	No	9169.96	8875.13	96.7848	1	1
614	FMU 09-021	SCIEB	Africa	Cameroon	Yes	43180.4	8864.51	20.529	7	4
615	PT.DIGUL DAYA SAKTI b	Unknown	Asia	Indonesia	No	245949	8726.95	3.54828	2	1
616	TFL23c	Unknown	North America	Canada	No	71887.8	8611.71	11.9794	1	1
617	Fraser TSA Yale Block30D b	Unknown	North America	Canada	No	234509	8611.63	3.67219	1	1
618	ALPAC Forest Products Incorporated	ALPAC Forest Products Incorporated	North America	Canada	Yes	6.53606e+06	8600.85	0.131591	3	3
619	SFIK	Société Forestière Industrielle de Koulamoutou	Africa	Gabon	No	137305	8552.55	6.22888	1	1
620	K1X 3 SCHEDULE_B	TERRACE COMMUNITY FOREST LIMITED PARTNERSHIP	North America	Canada	No	13015.5	8506.59	65.3575	1	1
621	PT.MERANTI SAKTI INDONESIA II	Unknown	Asia	Indonesia	No	39897.1	8490.43	21.2808	2	2
622	Weyerhaeuser Company Limited (Pembina Timberland)b	Weyerhaeuser Company Limited (Pembina Timberland)	North America	Canada	No	17541.2	8424.4	48.0263	3	1
623	Cranbrook TSA Block L05L	Unknown	North America	Canada	No	60311.2	8341.43	13.8306	3	3
624	PT.SUMBER MAS TIMBER	Unknown	Asia	Indonesia	No	54782.6	8316.11	15.1802	7	3
625	UAF 02451l	Unknown	North America	Canada	No	8237.44	8237.44	100	1	1
626	PT.AGRO CITY KALTIM	Unknown	Asia	Indonesia	No	16396.7	8059	49.1501	3	1
627	KOP.PUTRA DAYAK JAYA	Unknown	Asia	Indonesia	No	24715.3	7993.03	32.3404	1	1
628	046/11	Unknown	Africa	Democratic Republic of Congo	No	148660	7947.36	5.346	3	3
629	АО «Сегежский ЦБК» (1)	Segezha Pulp and Paper Mill JSC	Eurasia	Russia	Yes	714563	7893.33	1.10464	11	5
630	Ntombo	COTRANS	Africa	Republic of Congo	No	114912	7834.58	6.81792	3	2
631	PT.BENUA INDAH b	Unknown	Asia	Indonesia	No	8384.37	7792.57	92.9417	1	1
632	АО «Сегежский ЦБК»b	Unknown	Eurasia	Russia	No	526402	7758.41	1.47386	7	5
633	PT.SARANA TRISARA BHAKTI	Unknown	Asia	Indonesia	No	34145.7	7705.06	22.5653	7	2
634	T/0294 Ravenscourt	Samling	Asia	Malaysia	No	145025	7664.29	5.28482	14	8
635	PT.SATYAGUNA SULAJAYA	Unknown	Asia	Indonesia	No	14621.9	7651.88	52.3316	1	1
636	GMDCa	GMDC	Africa	Gabon	No	13153.2	7543.05	57.3478	3	1
637	PT.TELUK BINTUNI MINA AGRO K b	Unknown	Asia	Indonesia	No	41853.5	7481.69	17.8759	6	5
638	PT.ITCI KAYAN HUTANI (IKANI)	Unknown	Asia	Indonesia	No	131310	7379.92	5.62022	7	7
639	MPIGA jean	MPIGA jean	Africa	Gabon	No	7364.78	7364.78	100	1	1
640	Invermere TSA Block E09E	Unknown	North America	Canada	No	195582	7305.16	3.7351	2	2
641	PT.TRIJASA MAS KARYA INTI a	Unknown	Asia	Indonesia	No	33377	7245	21.7066	4	4
642	ООО "Карпогорылес"a	Unknown	Eurasia	Russia	No	33132.1	7199.56	21.7299	4	1
643	K1H 3 SCHEDULE_B	MCBRIDE COMMUNITY FOREST	North America	Canada	No	26762.7	7178.12	26.8213	1	1
644	CFAD Mandji	COMPAGNIE DES BOIS DU GABON	Africa	Gabon	Yes	167188	7176.58	4.29251	1	1
645	PT.SENTRAL PITULEMPA b	Unknown	Asia	Indonesia	No	12634.5	7028.6	55.6302	2	1
646	PT.CENTRICO b	Unknown	Asia	Indonesia	No	27220.2	7000.11	25.7166	2	1
647	NYANON-NGAMBÉ-NDOM	Unknown	Africa	Cameroon	No	19722.6	6957.07	35.2746	1	1
648	PT.RIMBA SEMPANA MAKMUR	Unknown	Asia	Indonesia	No	27363.3	6927.09	25.3153	5	3
649	FOREEX	Forestière d’Exploitation et d’Exportation	Africa	Gabon	No	135646	6743.85	4.97165	2	2
650	PT.MARIMUN TIMBER INDUSTRI	Unknown	Asia	Indonesia	No	40084.2	6739.92	16.8144	1	1
651	Wms Lk TSA Chezacut Block29B	Unknown	North America	Canada	No	296665	6730.42	2.26869	5	4
652	UMF I Jacunda	Unknown	South America	Brazil	Yes	55056.3	6676.27	12.1263	1	1
653	PT. ANUGERAH PRATAMA INSPIRASI	Unknown	Asia	Indonesia	No	43488.1	6671	15.3398	5	4
654	PT. Sulwood	Unknown	Asia	Indonesia	No	20838.6	6661.1	31.9653	4	2
655	PT. HUTANI KALIMANTAN ABADI PERMAI	Unknown	Asia	Indonesia	No	35479.9	6649.47	18.7415	4	3
656	NZOUBA Pierre	NZOUBA Pierre	Africa	Gabon	No	6844.67	6610.76	96.5825	1	1
657	PT. PALOPO TIMBER COMPANY	Unknown	Asia	Indonesia	No	38879.5	6572.68	16.9053	4	3
658	Sundance Forest Industries Ltd.	Sundance Forest Industries Ltd.	North America	Canada	No	226043	6549.81	2.89759	2	1
659	PT.TORAS BANUA SUKSES	Unknown	Asia	Indonesia	No	13580.3	6549.22	48.2259	2	2
660	10-066	Unknown	Africa	Cameroon	No	56837.4	6544.07	11.5137	1	1
661	ОАО «Майсклес»	Mayskles	Eurasia	Russia	Yes	146252	6467.27	4.42202	6	3
662	Arrow TSA Block B01Bl	Unknown	North America	Canada	No	25929.3	6463.61	24.9278	1	1
663	PT.HUTAN DOMAS RAYA	Unknown	Asia	Indonesia	No	111359	6396.63	5.74414	3	3
664	PT.BINA BALANTAK RAYA	Unknown	Asia	Indonesia	No	63096.2	6173.95	9.78498	1	1
665	TFL23d	Unknown	North America	Canada	No	149671	6133.18	4.09778	4	3
666	SOMALOMO	Unknown	Africa	Cameroon	No	22014.8	6075.08	27.5955	8	3
667	Queen Charlotte TSA Block A25Aj	Unknown	North America	Canada	No	55593.6	5992.45	10.779	7	5
668	10-047B	Unknown	Africa	Cameroon	No	42434.4	5987.73	14.1106	2	1
669	PT.KUSUMA ATLAS TIMBER b	Unknown	Asia	Indonesia	No	8045.59	5961.49	74.0965	3	2
670	PT.Karya Jaya Berdikari b	Unknown	Asia	Indonesia	No	28180.3	5948.41	21.1084	2	2
671	T/3342 Shin Yang Ind (Bint) SB	Shin Yang	Asia	Malaysia	No	210909	5922.21	2.80794	20	9
672	PT.Talisan Emas	Unknown	Asia	Indonesia	No	54664.6	5827.28	10.6601	2	2
673	FMU 09-008	MPACKO	Africa	Cameroon	Yes	36492.2	5786.64	15.8572	4	4
674	08-007A	Unknown	Africa	Cameroon	No	32036.4	5723.09	17.8643	3	2
675	UAF 09352o	Unknown	North America	Canada	No	9118.29	5563.72	61.0172	1	1
676	Morice TSA Block E20E	Unknown	North America	Canada	No	245242	5550.02	2.26308	2	1
677	10-009	Unknown	Africa	Cameroon	No	92631.2	5485.03	5.92137	16	4
678	Wms Lk TSA Kloacut Block29Ec	Unknown	North America	Canada	No	343742	5387.24	1.56723	2	2
679	NDONG AKOGHE Laurent	NDONG AKOGHE Laurent	Africa	Gabon	No	9913.67	5382.73	54.296	5	4
680	T/3355 Lee Ling Enterprises	Lee Ling	Asia	Malaysia	No	16731.4	5286.1	31.5938	2	1
681	Mid-Coast TSA Block B19Bg	Unknown	North America	Canada	No	5781.78	5271.25	91.1701	1	1
682	ООО «Карелиан Вуд Кампани»	Karelian Wood Company LLC	Eurasia	Russia	Yes	296538	5260.78	1.77407	3	2
683	Okanagan TSA Block 122A	Unknown	North America	Canada	No	386547	5210.57	1.34798	4	3
684	Golden TSA Block G07G	Unknown	North America	Canada	No	79967.3	5209.8	6.51492	1	1
685	АО «Форест»	Forest AO	Eurasia	Russia	Yes	70399.9	5186.49	7.36718	6	5
686	PT. RATAH TIMBER b	Unknown	Asia	Indonesia	Yes	6810.84	5151.82	75.6415	2	1
687	North Coast TSA Skeena Block21Cc	Unknown	North America	Canada	No	8553.96	5134	60.019	1	1
688	Lakes TSA Block G14Ga	Unknown	North America	Canada	No	5151.75	5130.41	99.5858	1	1
689	PT. INTISIXTA b	Unknown	Asia	Indonesia	No	11001.3	5080.18	46.1782	2	2
690	PT.GULAT II	Unknown	Asia	Indonesia	No	25366.8	5034.33	19.8461	4	2
691	ETOUGHE OTSAGHE Joseph	ETOUGHE OTSAGHE Joseph	Africa	Gabon	No	16283.2	4913.61	30.176	1	1
692	PT.WAPOGA III (d/h KAYU EKARIA) b	Unknown	Asia	Indonesia	No	10491.8	4853.02	46.2553	2	1
693	North Coast TSA Skeena Block21Cv	Unknown	North America	Canada	No	6533.86	4848.87	74.2114	1	1
694	PT.HUTAN BERSAMA	Unknown	Asia	Indonesia	No	108006	4841.04	4.48218	3	3
695	PT.SEWAKA LAHAN SENTOSA	Unknown	Asia	Indonesia	No	17686.7	4841.02	27.3709	4	3
696	LOMIE_2	Unknown	Africa	Cameroon	No	53355	4779.32	8.95758	11	4
697	UAF 03151	Unknown	North America	Canada	No	139914	4725.1	3.37715	2	1
698	Weyerhaeuser Company Limited (Pembina Timberland)a	Weyerhaeuser Company Limited (Pembina Timberland)	North America	Canada	No	813199	4686.77	0.576337	2	2
699	PT.Nusapadma Corp.	Unknown	Asia	Indonesia	No	6463.61	4667.54	72.2127	2	2
700	PT.BATASAN (PAPUA)	Unknown	Asia	Indonesia	No	103223	4660.43	4.51491	8	5
701	TFL25a	Unknown	North America	Canada	No	12109	4659	38.4755	4	3
702	TFL60	Unknown	North America	Canada	No	128671	4577.45	3.55747	5	4
703	PT.SARANA PIRANTI UTAMA	Unknown	Asia	Indonesia	No	52258.9	4524.24	8.65735	2	2
704	PT.MARUWAI TIMBER (BARITO PASIFIC TIMBER IV) c	Unknown	Asia	Indonesia	No	5001.77	4478.93	89.5468	3	1
705	Letili	SICOFOR	Africa	Republic of Congo	No	151222	4466.83	2.95381	1	1
706	PT. PERMATA BORNEO ABADI	Unknown	Asia	Indonesia	No	34030.8	4400.72	12.9316	11	5
707	STIBG	Société Transformation Intégrée Bois Gabon	Africa	Gabon	No	40034	4399.45	10.9893	1	1
708	K3H 8 SCHEDULE_B	NUXALK FORESTRY LIMITED PARTNERSHIP	North America	Canada	No	5179.23	4398.08	84.9176	1	1
709	PT.ACEH INTI TIMBER a	Unknown	Asia	Indonesia	No	32553.8	4376.38	13.4435	1	1
710	PT.MONDIALINDO SETYA PRATAMA	Unknown	Asia	Indonesia	No	99937.5	4343.61	4.34632	2	2
711	T/0280 KTN Timor	Samling	Asia	Malaysia	No	73297.4	4328.44	5.90532	5	2
712	TFL38a	Unknown	North America	Canada	No	4293.8	4293.8	99.9999	1	1
713	PT. AOI UNIT II//IV	Unknown	Asia	Indonesia	No	197380	4209.04	2.13246	1	1
714	PT.Tunas Pusaka Mandiri	Unknown	Asia	Indonesia	No	23598.5	4206.36	17.8247	5	4
715	K3C 1 SCHEDULE_B	KASLO AND DISTRICT COMMUNITY	North America	Canada	No	32442	4197.68	12.939	3	1
716	Kootenay Lake TSA Block C13C	Unknown	North America	Canada	No	63808.1	4178.35	6.5483	2	2
717	PT.BUMI RAYA UTAMA WOOD	Unknown	Asia	Indonesia	No	51119.4	4116.22	8.05217	1	1
718	Lakes TSA Block G14Gb	Unknown	North America	Canada	No	4084.03	4060.08	99.4136	1	1
719	PT. NARKATA RIMBA	Unknown	Asia	Indonesia	No	41571.1	4025.51	9.68345	5	2
720	PT.LAMURI TIMBER	Unknown	Asia	Indonesia	No	47120.1	4000.3	8.4896	1	1
721	CBPP (Licensed)ap	Corner Brook Pulp and Paper Limited	North America	Canada	No	52014.4	3998.81	7.68789	3	3
722	PT.SAGINDO SARI LESTARI I d	Unknown	Asia	Indonesia	No	7668.81	3957.5	51.6051	1	1
723	Boundary TSA Block F02F	Unknown	North America	Canada	No	185618	3954.85	2.13064	7	5
724	TFL44	Unknown	North America	Canada	No	32739.2	3932.4	12.0113	2	1
725	PT.INHUTANI I (UNIT SEGAH HULU)	Unknown	Asia	Indonesia	No	55130.2	3929.8	7.12821	6	3
726	PT. Zedsko Indonesia b	Unknown	Asia	Indonesia	No	8089.15	3927.85	48.557	2	1
727	048/12	Unknown	Africa	Democratic Republic of Congo	No	187834	3890.84	2.07143	5	3
728	11-002	Unknown	Africa	Cameroon	No	55371	3884.86	7.01605	1	1
729	Kalum TSA Block C10Cb	Unknown	North America	Canada	No	5636.26	3857.6	68.4424	1	1
730	Berth M'BENE MAYER	Berth M'BENE MAYER	Africa	Gabon	No	4131.96	3855.8	93.3165	3	1
731	Evinayong(a)	CHILBO	Africa	Equatorial Guinea	No	4427.18	3773.23	85.2288	1	1
732	Cranbrook TSA Block B05B	Unknown	North America	Canada	No	125613	3759.7	2.99309	1	1
733	Fraser TSA Yale Block30D a	Unknown	North America	Canada	No	5752.89	3755.45	65.2794	2	1
734	Gouongo	SICOFOR	Africa	Republic of Congo	No	240909	3672.83	1.52457	1	1
735	NZOUBA NDAMA Guy	NZOUBA NDAMA Guy	Africa	Gabon	No	12723.7	3617.7	28.4327	2	1
736	PT.TRIJASA MAS KARYA INTI b	Unknown	Asia	Indonesia	No	3617.27	3617.27	100	1	1
737	PT.WANA BHAKTI PERSADA U.	Unknown	Asia	Indonesia	No	47509	3542.19	7.45584	5	3
738	ООО «Сивец»	Sivets LLC	Eurasia	Russia	Yes	30828.2	3537.21	11.474	18	6
739	SEFCA 174	SEFCA	Africa	Central African Republic	No	400840	3523.67	0.879071	2	1
740	N. Coast TSA Outer Coast Blk21Dz	Unknown	North America	Canada	No	4288.96	3509.66	81.8301	1	1
741	PT.SAGINDO SARI LESTARI I c	Unknown	Asia	Indonesia	No	9364.47	3420.06	36.5216	4	2
742	PT.Widuri Utama Timber	Unknown	Asia	Indonesia	No	36089.4	3416	9.46538	1	1
743	Arrowsmith TSA, Barkley S.B.38Aat	Unknown	North America	Canada	No	18977.7	3415.93	17.9997	6	4
744	BOKOUE LOBE	BOKOUE LOBE	Africa	Gabon	No	47415.3	3359.89	7.08609	2	1
745	T/3476 Interglobal Empire	WTK	Asia	Malaysia	No	63380	3335.4	5.26254	5	2
746	KSU. MAYANG PUTRI PRIMA	Unknown	Asia	Indonesia	No	14633.3	3325.36	22.7247	2	1
747	PT. SARANG SAPTA PUTRA	Unknown	Asia	Indonesia	No	50878.9	3307.09	6.49992	3	2
748	Wms Lk TSA Anahim Block29Ac	Unknown	North America	Canada	No	3303.13	3303.13	100	1	1
749	PT.SAGINDO SARI LESTARI I b	Unknown	Asia	Indonesia	No	16709.5	3293.27	19.709	1	1
750	09-011	Unknown	Africa	Cameroon	No	30247.4	3291.79	10.8829	1	1
751	PT.KUSUMA ATLAS TIMBER c	Unknown	Asia	Indonesia	No	7116.92	3291.63	46.2508	5	2
752	GONDJOUT Laure Olga(b)	GONDJOUT Laure Olga	Africa	Gabon	No	4915.75	3231.58	65.7393	3	1
753	PT.BATASAN a	Unknown	Asia	Indonesia	No	19653.2	3217.21	16.3699	5	3
754	26042	Unknown	North America	Canada	No	16778.5	3202.05	19.0842	1	1
755	PT.KARYA LESTARI	Unknown	Asia	Indonesia	No	47704.6	3182.4	6.67107	1	1
756	PT.KALHOLD a	Unknown	Asia	Indonesia	No	23608.4	3168.62	13.4216	5	5
757	АО «Сегежский ЦБК»a	Unknown	Eurasia	Russia	No	1617745	3140.66	0.194138	1	1
758	PT.SENTRAL PITULEMPA c	Unknown	Asia	Indonesia	No	11759.9	3115.19	26.4899	1	1
759	Quesnel TSA South Kluskus Blk26Ac	Unknown	North America	Canada	No	8822.35	3104.11	35.1846	1	1
760	Acurenam	CHILBO	Africa	Equatorial Guinea	No	12767.2	3081.41	24.1353	2	1
761	PT.WANASOKAN HASILINDO	Unknown	Asia	Indonesia	No	46861.5	3060.62	6.5312	5	4
762	АО «Сегежский ЦБК» (2)	Segezha Pulp and Paper Mill JSC	Eurasia	Russia	Yes	1616806	3060.59	0.189299	2	1
763	K3H 7 SCHEDULE_B	NUXALK FORESTRY LIMITED PARTNERSHIP	North America	Canada	No	3556.97	3043.73	85.5709	1	1
764	Acurenam Cogo	COMALI	Africa	Equatorial Guinea	No	44620.5	3032.43	6.79604	2	1
765	K1X 1 SCHEDULE_B	TERRACE COMMUNITY FOREST LIMITED PARTNERSHIP	North America	Canada	No	8771.41	2941.63	33.5366	1	1
766	PT.WANA ADIPRIMA MANDIRI	Unknown	Asia	Indonesia	No	32847.8	2939.03	8.94741	6	1
767	PT.FITAMAYA ASMAPARA	Unknown	Asia	Indonesia	No	43581.6	2886.48	6.62316	1	1
768	UAF 08562c	Unknown	North America	Canada	No	3435.32	2872.84	83.6267	2	1
769	PT.KAYU WAJA	Unknown	Asia	Indonesia	No	39352.1	2859.03	7.26525	1	1
770	Evinayong(b)	CHILBO	Africa	Equatorial Guinea	No	4951.29	2856.95	57.7011	1	1
771	T/3372 Jaya Tiasa (JT)	Rimbunan Hijau	Asia	Malaysia	No	100714	2831.84	2.81175	15	8
772	Kalum TSA Block F10Fd	Unknown	North America	Canada	No	45206.7	2830.29	6.26079	6	4
773	MAVOUNGOU BOUYOU Vincent	MAVOUNGOU BOUYOU Vincent	Africa	Gabon	No	3930.8	2812.63	71.5536	1	1
774	PT.SENTRAL PITULEMPA a	Unknown	Asia	Indonesia	No	15574.2	2751.06	17.6642	2	2
775	MANGA Marie Marthe	MANGA Marie Marthe	Africa	Gabon	No	7219.93	2668.32	36.9577	1	1
776	PT.BUDHI NYATA b	Unknown	Asia	Indonesia	No	8021.44	2631.29	32.8033	1	1
777	MUTIARA KALJA PERMAI b	Unknown	Asia	Indonesia	No	2614.89	2614.89	100	1	1
778	Tropical Logs Production	HUA JIA	Africa	Gabon	No	101720	2614.12	2.56992	3	3
779	T/3135 Pasin	Ta Ann	Asia	Malaysia	No	110812	2611.58	2.35676	14	3
780	09-006	Unknown	Africa	Cameroon	No	60517.6	2589.56	4.27903	9	4
781	Black Sturgeon Forest	Bowater Canadian Forest Products Inc.	North America	Canada	No	515361	2534.99	0.491887	6	3
782	PT.HANURATA COY LTD (SORONG) c	Unknown	Asia	Indonesia	No	4152.6	2534.27	61.0286	1	1
783	PT.MUGITRIMAN INTERNATIONAL a	Unknown	Asia	Indonesia	No	2974.65	2524.13	84.8546	1	1
784	North Coast TSA Skeena Block21Ca	Unknown	North America	Canada	No	4403.54	2482.96	56.3854	1	1
785	PT. RATAH TIMBER a	Unknown	Asia	Indonesia	Yes	85901.7	2479.4	2.88632	3	1
786	UAF 08665f	Unknown	North America	Canada	No	8154.24	2362.97	28.9784	8	3
787	GMDCb	GMDC	Africa	Gabon	No	25319.8	2338.72	9.23671	3	2
788	61/14	Unknown	Africa	Democratic Republic of Congo	No	249954	2326.42	0.930739	1	1
789	FMU 09-007	MPACKO	Africa	Cameroon	Yes	44912.1	2316.75	5.15842	1	1
790	PT.KALHOLD b	Unknown	Asia	Indonesia	No	21120.1	2304.57	10.9117	1	1
791	T/3228 Shin Yang	Shin Yang	Asia	Malaysia	No	73717.4	2297.3	3.11637	6	2
792	UAF 08652n	Unknown	North America	Canada	No	328500	2227.56	0.678101	6	3
793	MacKenzie TSA Block F16Fa	Unknown	North America	Canada	No	2214.35	2214.35	100	1	1
794	PT.BALANTAK RIMBA REJEKI	Unknown	Asia	Indonesia	No	6165.81	2175.41	35.2818	2	2
795	PT.SINERGI BUMI LESTARI a	Unknown	Asia	Indonesia	No	4238.87	2171.33	51.2243	3	2
796	PT.Mangole Timber Prod. II	Unknown	Asia	Indonesia	No	11956.6	2168.09	18.133	1	1
797	PT.Mangole Timber V (DH.PT.Ceram Cahaya Tbr)	Unknown	Asia	Indonesia	No	17143.2	2135.2	12.4551	1	1
798	ANC Timber Ltd.	ANC Timber Ltd.	North America	Canada	No	374319	2116.54	0.565438	1	1
799	Arrow TSA Block G01G	Unknown	North America	Canada	No	67091.7	2109.48	3.14418	6	3
800	PAG14a	Unknown	North America	Canada	No	2100.23	2100.23	100	1	1
801	T/3371 Jaya Tiasa (JT)	Rimbunan Hijau	Asia	Malaysia	No	138605	2093.63	1.5105	5	1
802	K2P A SCHEDULE_B	WETZIN'KWA COMMUNITY FOREST CORPORATION	North America	Canada	No	32897.7	2072.16	6.2988	2	2
803	PAG05b	Unknown	North America	Canada	No	49674.1	2068.06	4.16325	5	2
804	Quesnel TSA Cunningham Block26H	Unknown	North America	Canada	No	49674	2068.06	4.16325	5	2
805	Romeo Malette Forest	Tembec Industries Inc.	North America	Canada	No	611723	2045.41	0.33437	5	2
806	PT.CITRA LEMBAH KENCANA ( TUNGGAL YUDI UNIT IV) a	Unknown	Asia	Indonesia	No	205501	2033.62	0.989591	1	1
807	PT. THE BEST ONE UNIT TIMBER	Unknown	Asia	Indonesia	No	39607	2026.99	5.11775	2	1
808	PT.WIRALANO	Unknown	Asia	Indonesia	No	56884.1	2001.43	3.51843	4	2
809	PT.Gema Hutani Lestari (d/h. PT. Gema Sanubari)	Unknown	Asia	Indonesia	Yes	9063.96	1956.82	21.589	5	3
810	UAF 08562a	Unknown	North America	Canada	No	1927.87	1927.87	100	1	1
811	UAF 09352m	Unknown	North America	Canada	No	121193	1909.22	1.57536	4	2
812	KOP.PONPES NAJMUSSALAM	Unknown	Asia	Indonesia	No	30619.8	1871.6	6.11241	3	2
813	K3K 4 SCHEDULE_B	BELLA COOLA RESOURCE SOCIETY	North America	Canada	No	4863.72	1870.65	38.4612	1	1
814	Mid-Coast TSA Block E19Eb	Unknown	North America	Canada	No	45349.2	1862.77	4.1076	3	1
815	10-012	Unknown	Africa	Cameroon	No	59401.8	1850.88	3.11586	8	4
816	Arrow TSA Block H01H	Unknown	North America	Canada	No	9135.22	1815.19	19.8702	1	1
817	PT.Nusa Niwe Indah	Unknown	Asia	Indonesia	No	65759.6	1793.77	2.72777	1	1
818	ОАО «Амгу»	JSC “Amgu”	Eurasia	Russia	Yes	365220	1731.12	0.473994	9	4
819	K3H 1 SCHEDULE_B	NUXALK FORESTRY LIMITED PARTNERSHIP	North America	Canada	No	3338.43	1730.55	51.8373	4	2
820	TFL3	Unknown	North America	Canada	No	79106.1	1718.97	2.173	4	2
821	PT.GRAHA SENTOSA PERMAI	Unknown	Asia	Indonesia	No	45250.8	1700.13	3.75712	3	3
822	CBPP (Licensed)g	Corner Brook Pulp and Paper Limited	North America	Canada	No	6933.61	1690.18	24.3767	2	2
823	K3O 2 SCHEDULE_B	DUNSTER COMMUNITY FOREST SOCIETY	North America	Canada	No	4350.11	1674.65	38.4968	4	2
824	Wms Lk TSA Gaspard Block29Fc	Unknown	North America	Canada	No	235329	1655.63	0.703538	1	1
825	N. Coast TSA Outer Coast Blk21Dw	Unknown	North America	Canada	No	5852.95	1654.43	28.2666	1	1
826	UAF 02451m	Unknown	North America	Canada	No	1631	1631	100	1	1
827	PT.BENUA INDAH a	Unknown	Asia	Indonesia	No	48905.2	1629.13	3.33119	3	2
828	PT.INHUTANI I (PIMPING)	Unknown	Asia	Indonesia	No	43111.1	1573.56	3.65002	1	1
829	MOUANGA ZELE	MOUANGA ZELE	Africa	Gabon	No	10754.4	1573.08	14.6273	2	1
830	GONDJOUT Laure Olga(a)	GONDJOUT Laure Olga	Africa	Gabon	No	10276.5	1566.14	15.24	3	1
831	FMU 09-025	SCIEB	Africa	Cameroon	Yes	89081.4	1546.26	1.73578	3	2
832	T0996 1	INTERNATIONAL FOREST PRODUCTS LIMITED	North America	Canada	No	1541.2	1541.2	100	1	1
833	EDEA 2	Unknown	Africa	Cameroon	No	8658.32	1476.07	17.048	1	1
834	Scierie de Nyali ( SDN )	Scierie de Nyali ( SDN )	Africa	Gabon	No	6272.79	1475.13	23.5164	1	1
835	PT.ACEH INTI TIMBER b	Unknown	Asia	Indonesia	No	16053.6	1465.61	9.12946	1	1
836	Fraser TSA Stave Block30F	Unknown	North America	Canada	No	167579	1452.13	0.866539	10	6
837	Morice TSA Block A20Aa	Unknown	North America	Canada	No	6898.56	1432.8	20.7695	16	3
838	K2M 3 SCHEDULE_B	MCLEOD LAKE MACKENZIE COMMUNITY FOREST LIMITED PARTNERSHIP	North America	Canada	No	6827.39	1387.73	20.3259	1	1
839	K2U A SCHEDULE_B	LOWER SIMILKAMEEN COMMUNITY FORESTS LIMITED PARTNERSHIP	North America	Canada	No	26801.5	1379.52	5.14717	5	2
840	PT.BUDHI NYATA c	Unknown	Asia	Indonesia	No	1782.15	1356.56	76.1196	1	1
841	PT.SARI BUMI KUSUMA (UNIT I DAN II)	Unknown	Asia	Indonesia	Yes	143681	1337.89	0.931152	7	2
842	T/3236 Ankura Trading (M)	Rimbunan Hijau	Asia	Malaysia	No	45082	1334.6	2.96038	7	1
843	Fort St John TSA Block D40Da	Unknown	North America	Canada	No	1288.31	1288.31	100	1	1
844	PAG12a	Unknown	North America	Canada	No	1288.31	1288.31	100	1	1
845	TFL19	Unknown	North America	Canada	No	171260	1281.07	0.748025	6	2
846	PT.HARAPAN KITA UTAMA b	Unknown	Asia	Indonesia	No	5121.4	1279	24.9737	2	1
847	TFL54l	Unknown	North America	Canada	No	11344.6	1241.09	10.9399	1	1
848	MacKenzie TSA Block N16N	Unknown	North America	Canada	No	151747	1228.25	0.809405	1	1
849	09-004B	Unknown	Africa	Cameroon	No	66129.8	1207.6	1.82611	4	2
850	UAF 02451k	Unknown	North America	Canada	No	1185.25	1185.25	100	1	1
851	PT.INHUTANI II (UNIT MALINAU)	Unknown	Asia	Indonesia	No	46739.3	1182.61	2.53023	1	1
852	PT.SINERGI BUMI LESTARI b	Unknown	Asia	Indonesia	No	2022.28	1177.94	58.2481	3	1
853	ООО «Крона» (1)	Krona LLC	Eurasia	Russia	Yes	13643.4	1160.62	8.50687	4	2
854	T0608 3	INTERNATIONAL FOREST PRODUCTS LIMITED	North America	Canada	No	1682.78	1158.25	68.8295	1	1
855	T0491 3	IISAAK FOREST RESOURCES LIMITED	North America	Canada	No	1149.36	1119.06	97.3642	2	1
856	PT. HARAPAN TIGA PUTERA	Unknown	Asia	Indonesia	No	5984.5	1103.87	18.4455	1	1
857	CBPP (Licensed)e	Corner Brook Pulp and Paper Limited	North America	Canada	No	7710.21	1097.5	14.2344	1	1
858	Wms Lk TSA Anahim Block29Ab	Unknown	North America	Canada	No	1092.98	1092.98	100	1	1
859	CBPP (Licensed)al	Corner Brook Pulp and Paper Limited	North America	Canada	No	1125.65	1088.81	96.7272	1	1
860	TFL57i	Unknown	North America	Canada	No	1105.77	1085.7	98.1851	1	1
861	Arrow TSA Block E01E	Unknown	North America	Canada	No	59524.9	1051.12	1.76584	1	1
862	Kingcome TSA Broughton Block33Du	Unknown	North America	Canada	No	1853.21	1045.65	56.4239	1	1
863	CBPP (Licensed)c	Corner Brook Pulp and Paper Limited	North America	Canada	No	1790.32	1027.78	57.4076	1	1
864	T0280 3	WESTERN FOREST PRODUCTS INC.	North America	Canada	Yes	1526.29	1010.21	66.1869	3	1
865	Morice TSA Block A20Ab	Unknown	North America	Canada	No	1543.75	1008.93	65.3556	1	1
866	UAF 02451n	Unknown	North America	Canada	No	1006.46	1006.46	100	1	1
867	ROUGIER 191	ROUGIER	Africa	Central African Republic	No	265278	1000.6	0.377189	2	1
868	UFA Pokola	CIB-OLAM	Africa	Republic of Congo	Yes	454342	993.979	0.218774	2	1
869	K1H 1 SCHEDULE_B	MCBRIDE COMMUNITY FOREST	North America	Canada	No	18884.9	986.16	5.22195	1	1
870	UAF 08562d	Unknown	North America	Canada	No	1418.33	962.512	67.8623	3	1
871	CBPP (REID LOT PURCHASE)C	Corner Brook Pulp and Paper Limited	North America	Canada	No	10985.1	944.565	8.59861	1	1
872	T0313 1	WESTERN FOREST PRODUCTS INC.	North America	Canada	Yes	1466.67	925.419	63.0965	1	1
873	Black River Forest	Great West Timber Limited	North America	Canada	No	253165	914.586	0.361261	1	1
874	ОАО «Монди СЛПК» (ю)	Open Joint Stock Company Mondi Syktyvkar	Eurasia	Russia	Yes	722539	907.354	0.125579	8	3
875	АО "Монди СЛПК"c	Unknown	Eurasia	Russia	No	685645	876.256	0.1278	8	2
876	Arrow TSA Block B01Bb	Unknown	North America	Canada	No	1872.66	874.736	46.711	1	1
877	GMDCd	GMDC	Africa	Gabon	No	5811.03	858.768	14.7783	1	1
878	K3H 3 SCHEDULE_B	NUXALK FORESTRY LIMITED PARTNERSHIP	North America	Canada	No	1433.94	832.053	58.0254	1	1
879	TFL45a	Unknown	North America	Canada	No	4127.75	815.106	19.747	1	1
880	Merritt TSA Block 818H	Unknown	North America	Canada	No	126698	809.83	0.639179	5	2
881	PT.INHUTANI I (UNIT MERAANG)	Unknown	Asia	Indonesia	No	147342	803.822	0.54555	2	1
882	PT.LEMBAH HIJAU SEMESTA	Unknown	Asia	Indonesia	No	31071.6	802.501	2.58275	6	3
883	PT. Zedsko Indonesia a	Unknown	Asia	Indonesia	No	24234.2	801.221	3.30616	1	1
884	K3H 2 SCHEDULE_B	NUXALK FORESTRY LIMITED PARTNERSHIP	North America	Canada	No	7317.08	797.177	10.8947	4	1
885	TFL1g	Unknown	North America	Canada	No	3051.5	794.838	26.0474	1	1
886	ООО «Ксилотек-Сибирь»	KsiloTek-Siberia LLC	Eurasia	Russia	Yes	221668	791.405	0.357023	2	1
887	K1H 4 SCHEDULE_B	MCBRIDE COMMUNITY FOREST	North America	Canada	No	7972.12	775.878	9.73239	1	1
888	PT.MUGITRIMAN INTERNATIONAL b	Unknown	Asia	Indonesia	No	789.994	775.862	98.211	1	1
889	АО «Лесосибирский ЛДК №1»	Lesosibirskiy LDK #1	Eurasia	Russia	Yes	851901	764.029	0.0896851	4	4
890	Morice TSA Block C20Ca	Unknown	North America	Canada	No	763.297	763.295	99.9998	1	1
891	Arrow TSA Block F01F	Unknown	North America	Canada	No	57170.1	735.003	1.28564	3	3
892	T0697 1	INTERNATIONAL FOREST PRODUCTS LIMITED	North America	Canada	No	778.692	713.36	91.61	1	1
893	CBPP (REID LOT PURCHASE)B	Corner Brook Pulp and Paper Limited	North America	Canada	No	7366.68	711.062	9.65242	2	2
894	Fraser TSA Chilliwack Block30B	Unknown	North America	Canada	No	120392	697.423	0.579295	1	1
895	MacKenzie TSA Block K16Kg	Unknown	North America	Canada	No	2073.31	695.023	33.5224	3	1
896	T0357 1	WESTERN FOREST PRODUCTS INC.	North America	Canada	Yes	681.581	681.581	100	1	1
897	T0258 1	WESTERN FOREST PRODUCTS INC.	North America	Canada	Yes	1867.06	670.338	35.9034	1	1
898	Kalum TSA Block F10Fe	Unknown	North America	Canada	No	4704.67	651.188	13.8413	6	2
899	MUTIARA KALJA PERMAI c	Unknown	Asia	Indonesia	No	1634.83	647.218	39.5892	3	1
900	T0816 8	TOLKO INDUSTRIES LTD.	North America	Canada	No	6220.9	631.583	10.1526	4	1
901	T/9115 Majulaba	Samling	Asia	Malaysia	No	36218.3	620.82	1.71411	5	2
902	T0291 3	WESTERN FOREST PRODUCTS INC.	North America	Canada	Yes	812.895	618.973	76.1442	1	1
903	UAF 08652j	Unknown	North America	Canada	No	20055.6	617.634	3.07961	2	2
904	PT.TRIJASA MAS KARYA INTI c	Unknown	Asia	Indonesia	No	2831.28	604.019	21.3338	2	2
905	SUMALINDO LESTARI JAYA V b	Unknown	Asia	Indonesia	No	3203.91	600.862	18.754	3	1
906	Ngongo-nzambiI	Unknown	Africa	Republic of Congo	No	231845	597.597	0.257757	1	1
907	TFL38c	Unknown	North America	Canada	No	576.918	576.917	99.9998	2	1
908	T0945 0	INTERNATIONAL FOREST PRODUCTS LIMITED	North America	Canada	No	555.037	555.037	100	1	1
909	T0368 1	WESTERN FOREST PRODUCTS INC.	North America	Canada	Yes	1220.59	553.648	45.359	2	2
910	T0379 1	WESTERN FOREST PRODUCTS INC.	North America	Canada	Yes	802.743	522.374	65.0737	1	1
911	CBPP (REID LOT PURCHASE)A	Corner Brook Pulp and Paper Limited	North America	Canada	No	2105.7	519.289	24.6611	1	1
912	T0302 4	WESTERN FOREST PRODUCTS INC.	North America	Canada	Yes	657.215	503.023	76.5386	1	1
913	TFL57g	Unknown	North America	Canada	No	980.958	484.225	49.3624	2	1
914	SNBG-OVG	SNBG-OVG	Africa	Gabon	No	133631	480.844	0.359831	1	1
915	MOMBO AGAYA Jean Bernard	MOMBO AGAYA Jean Bernard	Africa	Gabon	No	6416.58	469.745	7.32079	1	1
916	Wms Lk TSA Kloacut Block29Eb	Unknown	North America	Canada	No	451.576	451.576	100	1	1
917	TFL30	Unknown	North America	Canada	No	180338	434.493	0.240933	2	2
918	T0959 2	INTERNATIONAL FOREST PRODUCTS LIMITED	North America	Canada	No	2464.29	426.948	17.3254	4	1
919	Cranbrook TSA Block J05J	Unknown	North America	Canada	No	158907	423.62	0.266584	2	1
920	KUD.BERINGIN MULYA	Unknown	Asia	Indonesia	No	21449.7	421.819	1.96655	2	1
921	07-002	Unknown	Africa	Cameroon	No	76264.3	385.012	0.504839	1	1
922	CBPP (Licensed)i	Corner Brook Pulp and Paper Limited	North America	Canada	No	29538.6	377.962	1.27955	1	1
923	FMU 09-003b	LOREMA	Africa	Cameroon	Yes	799.573	374.911	46.889	10	0
924	TC1 026041b	Unknown	North America	Canada	No	3039.35	373.713	12.2958	2	1
925	TFL52a	Unknown	North America	Canada	No	260176	369.455	0.142002	8	1
926	T0451 1	TOLKO INDUSTRIES LTD.	North America	Canada	No	2695.03	365.178	13.5501	3	2
927	Arrow TSA Block D01D	Unknown	North America	Canada	No	42664.3	353.777	0.829212	1	1
928	Invermere TSA Block C09Cb	Unknown	North America	Canada	No	344.148	344.148	100	1	1
929	ИП Заречный В. А.	Zarechniy VA IP	Eurasia	Russia	Yes	103210	340.994	0.330388	1	1
930	Wms Lk TSA Anahim Block29Aa	Unknown	North America	Canada	No	340.743	340.743	100	1	1
931	T0990 1a	INTERNATIONAL FOREST PRODUCTS LIMITED	North America	Canada	No	968.02	337.202	34.8343	2	1
932	Crossroute Forest	Abitibi-Consolidated Company of Canada	North America	Canada	No	1.53939e+06	313.941	0.0203938	4	1
933	T0996 3	INTERNATIONAL FOREST PRODUCTS LIMITED	North America	Canada	No	375.071	291.545	77.7308	3	1
934	Kingcome TSA Broughton Block33Da	Unknown	North America	Canada	No	687.637	290.964	42.3137	1	1
935	Morice TSA Block A20Ac	Unknown	North America	Canada	No	631.194	288.577	45.7193	2	1
936	T0840 1	IISAAK FOREST RESOURCES LIMITED	North America	Canada	No	284.75	284.75	100	3	1
937	UAF 04251	Unknown	North America	Canada	No	793655	282.6	0.0356074	1	1
938	T0941 0	INTERNATIONAL FOREST PRODUCTS LIMITED	North America	Canada	No	282.164	281.029	99.5978	1	1
939	T0225 1	WESTERN FOREST PRODUCTS INC.	North America	Canada	Yes	1174.61	279.933	23.832	5	1
940	Arrowsmith TSA, Barkley S.B.38Ac	Unknown	North America	Canada	No	279.249	279.249	100	1	1
941	PT.DAYA SAKTI KRIDA UNGGUL b	Unknown	Asia	Indonesia	No	13689.9	273.259	1.99607	1	1
942	MOUGOULA ROBACKY Hervé	MOUGOULA ROBACKY Hervé	Africa	Gabon	No	4400.95	272.411	6.18983	2	1
943	PT.BENTARA AGRA TIMBER	Unknown	Asia	Indonesia	No	22533	259.659	1.15235	1	1
944	T0900 0	WESTERN FOREST PRODUCTS INC.	North America	Canada	Yes	258.798	258.798	100	1	1
945	T0891 0	WESTERN FOREST PRODUCTS INC.	North America	Canada	Yes	255.898	255.898	100	1	1
946	T0697 2	INTERNATIONAL FOREST PRODUCTS LIMITED	North America	Canada	No	255.744	255.728	99.9934	1	1
947	TFL43	Unknown	North America	Canada	No	5341.56	255.313	4.77974	1	1
948	PT.MELAPI TIMBER	Unknown	Asia	Indonesia	No	81759.8	254.074	0.310757	2	1
949	T0296 0	B & I RESOURCES LTD.	North America	Canada	No	253.344	253.344	100	1	1
950	10-033	Unknown	Africa	Cameroon	No	52427.5	252.423	0.481471	1	1
951	Queen Charlotte TSA Block A25Ah	Unknown	North America	Canada	No	30089.5	243.944	0.810729	1	1
952	T0816 5A	TOLKO INDUSTRIES LTD.	North America	Canada	No	1295.46	238.889	18.4405	1	1
953	T0302 3	WESTERN FOREST PRODUCTS INC.	North America	Canada	Yes	1540.99	229.226	14.8753	4	1
954	TFL57h	Unknown	North America	Canada	No	326.121	227.22	69.6734	2	1
955	PT. TIAR BUNGIN ELOK a	Unknown	Asia	Indonesia	No	21670.1	218.745	1.00943	1	1
956	Invermere TSA Block C09Ca	Unknown	North America	Canada	No	351.863	209.573	59.5609	1	1
957	T0843 1	IISAAK FOREST RESOURCES LIMITED	North America	Canada	No	210.418	206.805	98.2829	1	1
958	PT.FORTUNA CIPTA SEJAHTERA b	Unknown	Asia	Indonesia	No	19431.5	204.734	1.05362	2	1
959	033/11	SICOBOIS	Africa	Democratic Republic of Congo	No	94308.4	201.164	0.213304	1	1
960	T0697 3	INTERNATIONAL FOREST PRODUCTS LIMITED	North America	Canada	No	259.118	199.666	77.0561	1	1
961	T0324 3	WESTERN FOREST PRODUCTS INC.	North America	Canada	Yes	351.137	198.959	56.6614	1	1
962	T0996 2	INTERNATIONAL FOREST PRODUCTS LIMITED	North America	Canada	No	330.008	197.248	59.7705	1	1
963	Arrowsmith TSA, Barkley S.B.38Af	Unknown	North America	Canada	No	445.855	196.888	44.1596	2	1
964	W1986 1 SCHEDULE_B	LORRY TALBOT	North America	Canada	No	1638.09	194.481	11.8724	2	1
965	T0840 2	IISAAK FOREST RESOURCES LIMITED	North America	Canada	No	188.741	188.741	100	1	1
966	Arrowsmith TSA, Barkley S.B.38Ad	Unknown	North America	Canada	No	188.741	188.741	100	1	1
967	K3O 1 SCHEDULE_B	DUNSTER COMMUNITY FOREST SOCIETY	North America	Canada	No	15656.5	188.33	1.20289	2	1
968	Arrowsmith TSA, Barkley S.B.38Al	Unknown	North America	Canada	No	507.814	184.318	36.2963	3	1
969	Arrowsmith TSA, Barkley S.B.38Aar	Unknown	North America	Canada	No	50099.3	176.843	0.352985	2	1
970	T0291 2	WESTERN FOREST PRODUCTS INC.	North America	Canada	Yes	557.28	174.079	31.2372	2	1
971	T0368 3	WESTERN FOREST PRODUCTS INC.	North America	Canada	Yes	1272.92	170.49	13.3936	3	0
972	T0690 21	INTERNATIONAL FOREST PRODUCTS LIMITED	North America	Canada	No	258.491	170.417	65.9277	1	1
973	T0028 7	WESTERN FOREST PRODUCTS INC.	North America	Canada	Yes	260.553	159.135	61.0759	2	1
974	T0690 20	INTERNATIONAL FOREST PRODUCTS LIMITED	North America	Canada	No	259.752	156.616	60.2945	1	1
975	T0837 1	IISAAK FOREST RESOURCES LIMITED	North America	Canada	No	253.223	154.019	60.8234	1	1
976	Queen Charlotte TSA Block B25Bf	Unknown	North America	Canada	No	194.326	151.49	77.9566	1	1
977	T/9161 STIDC (Part 3)	STIDC / Sarawak Foundation	Asia	Malaysia	No	5855.63	144.148	2.46169	5	0
978	MacKenzie TSA Block K16Ka	Unknown	North America	Canada	No	142.933	142.933	100	1	1
979	T0713 3	GILBERT SMITH FOREST PRODUCTS LTD.	North America	Canada	No	2251.37	141.878	6.30182	2	1
980	T0834 3	IISAAK FOREST RESOURCES LIMITED	North America	Canada	No	208.572	138.517	66.412	1	1
981	PT.MUGITRIMAN INTERNATIONAL c	Unknown	Asia	Indonesia	No	667.32	137.861	20.6589	1	1
982	T0295 17	WESTERN FOREST PRODUCTS INC.	North America	Canada	Yes	259.634	127.223	49.0008	1	1
983	TFL45d	Unknown	North America	Canada	No	2503.18	126.08	5.03681	1	1
984	Queen Charlotte TSA Block A25Ai	Unknown	North America	Canada	No	139.652	122.508	87.7233	1	1
985	T0355 1	WESTERN FOREST PRODUCTS INC.	North America	Canada	Yes	2001.45	121.976	6.0944	5	0
986	PT.Mulya Karya Jayaco	Unknown	Asia	Indonesia	No	37346.8	114.509	0.306611	1	1
987	Mid-Coast TSA Block B19Be	Unknown	North America	Canada	No	185.992	112.537	60.5063	1	1
988	UAF 02351b	Unknown	North America	Canada	No	250.995	112.127	44.673	1	1
989	T0771 1	WESTERN FOREST PRODUCTS INC.	North America	Canada	Yes	259.206	110.543	42.6469	3	0
990	Wms Lk TSA Anahim Block29Ad	Unknown	North America	Canada	No	109.843	109.843	100	1	1
991	W0461 A SCHEDULE_B	PHILIP DESMAZES	North America	Canada	No	425.106	108.132	25.4366	3	1
992	T0994 1	INTERNATIONAL FOREST PRODUCTS LIMITED	North America	Canada	No	648.468	105.797	16.3149	2	1
993	MacKenzie TSA Block E16Ea	Unknown	North America	Canada	No	105.249	105.249	100	1	1
994	T0831 1	IISAAK FOREST RESOURCES LIMITED	North America	Canada	No	174.443	99.1956	56.8643	2	0
995	Arrowsmith TSA, Barkley S.B.38Ak	Unknown	North America	Canada	No	174.443	99.1956	56.8643	2	0
996	T0690 19	INTERNATIONAL FOREST PRODUCTS LIMITED	North America	Canada	No	259.096	95.8957	37.0117	2	0
997	Arrow TSA Block B01Bi	Unknown	North America	Canada	No	126.514	91.8738	72.6195	1	0
998	T0635 8A	CANOE FOREST PRODUCTS LTD.	North America	Canada	No	472.547	90.7054	19.195	1	0
999	UAF 09452j	Unknown	North America	Canada	No	86.764	86.764	100	1	0
1000	T0368 2	WESTERN FOREST PRODUCTS INC.	North America	Canada	Yes	398.316	86.142	21.6266	1	0
1001	W1629 A SCHEDULE_B	DISTRICT MGR SKEENA STIKINE (DSS)	North America	Canada	No	425.353	85.9444	20.2054	1	0
1002	T0774 1	WESTERN FOREST PRODUCTS INC.	North America	Canada	Yes	259.205	83.9613	32.3918	1	0
1003	T0356 0	INTERNATIONAL FOREST PRODUCTS LIMITED	North America	Canada	No	756.364	79.6883	10.5357	5	0
1004	AGAMBOUET Claudine	AGAMBOUET Claudine	Africa	Gabon	No	8154.14	78.2797	0.96	1	0
1005	IBNG Lambaréné	IBNG	Africa	Gabon	No	74853.3	77.2889	0.103254	1	0
1006	W0070 A SCHEDULE_B	ROBERT THOMPSON	North America	Canada	No	394.65	77.0631	19.527	1	0
1007	T0357 2	WESTERN FOREST PRODUCTS INC.	North America	Canada	Yes	92.6674	76.9358	83.0236	1	0
1008	T0690 23	INTERNATIONAL FOREST PRODUCTS LIMITED	North America	Canada	No	258.899	75.0221	28.9773	1	0
1009	W1829 A SCHEDULE_B	SCOTT MCKENZIE	North America	Canada	No	598.996	71.7425	11.9771	1	0
1010	CV. PANGKAR BEGILI	Unknown	Asia	Indonesia	No	11290.9	69.2374	0.613217	2	0
1011	T0302 5	WESTERN FOREST PRODUCTS INC.	North America	Canada	Yes	213.799	68.2397	31.9176	1	0
1012	K3H 4 SCHEDULE_B	NUXALK FORESTRY LIMITED PARTNERSHIP	North America	Canada	No	409.282	66.206	16.1761	2	0
1013	PT.TRI TUNGGAL EBONI	Unknown	Asia	Indonesia	No	92436.6	65.4761	0.0708335	1	0
1014	T0650 0	INTERNATIONAL FOREST PRODUCTS LIMITED	North America	Canada	No	551.047	64.2207	11.6543	1	0
1015	T0364 1	INTERNATIONAL FOREST PRODUCTS LIMITED	North America	Canada	No	309.131	62.0565	20.0745	2	0
1016	T0690 18	INTERNATIONAL FOREST PRODUCTS LIMITED	North America	Canada	No	255.281	60.9733	23.8847	1	0
1017	T0690 22	INTERNATIONAL FOREST PRODUCTS LIMITED	North America	Canada	No	259.14	59.1022	22.8071	1	0
1018	T/0285M Jelita Timber Co	KTS	Asia	Malaysia	No	27943	58.5474	0.209524	3	0
1019	T0324 1	WESTERN FOREST PRODUCTS INC.	North America	Canada	Yes	178.565	57.9671	32.4628	1	0
1020	T0377 2	A & A TRADING LTD.	North America	Canada	No	256.339	57.564	22.4562	1	0
1021	T0313 4	WESTERN FOREST PRODUCTS INC.	North America	Canada	Yes	620.399	56.7552	9.14817	2	0
1022	T0335 1	WESTERN FOREST PRODUCTS INC.	North America	Canada	Yes	1282.11	56.0984	4.37547	5	0
1023	T0335 2	WESTERN FOREST PRODUCTS INC.	North America	Canada	Yes	102.377	48.636	47.5068	1	0
1024	T0324 2	WESTERN FOREST PRODUCTS INC.	North America	Canada	Yes	427.016	47.5712	11.1404	1	0
1025	Sundre Forest Products Inc.	Sundre Forest Products Inc.	North America	Canada	No	554219	47.0266	0.00848519	3	0
1026	ООО «Вятский фанерный комбинат»	Vyatsky Plywood Mill Ltd.	Eurasia	Russia	Yes	294284	46.9844	0.0159657	1	0
1027	UAF 02751a	Unknown	North America	Canada	No	44.0233	44.0233	100	1	0
1028	W0144 A SCHEDULE_B	WILHELM PENNER	North America	Canada	No	335.137	43.5465	12.9937	1	0
1029	T0491 2	IISAAK FOREST RESOURCES LIMITED	North America	Canada	No	186.601	42.8691	22.9737	1	0
1030	TFL57o	Unknown	North America	Canada	No	187.38	42.8691	22.8781	1	0
1031	T0715 2	WESTERN FOREST PRODUCTS INC.	North America	Canada	Yes	262.065	42.7935	16.3293	1	0
1032	T0834 1	IISAAK FOREST RESOURCES LIMITED	North America	Canada	No	77.8371	41.7887	53.6874	1	0
1033	UAF 02451f	Unknown	North America	Canada	No	40.2947	40.2947	100	1	0
1034	T0407 1	INTERNATIONAL FOREST PRODUCTS LIMITED	North America	Canada	No	597.604	39.3637	6.58692	2	0
1035	Quesnel TSA South Kluskus Blk26Ad	Unknown	North America	Canada	No	9106.95	38.734	0.425323	1	0
1036	T0028 8	WESTERN FOREST PRODUCTS INC.	North America	Canada	Yes	257.482	36.9908	14.3663	1	0
1037	T0690 14	INTERNATIONAL FOREST PRODUCTS LIMITED	North America	Canada	No	261.439	36.6965	14.0363	1	0
1038	T0390 1	WESTERN FOREST PRODUCTS INC.	North America	Canada	Yes	486.34	36.2257	7.44862	2	0
1039	T0690 2	INTERNATIONAL FOREST PRODUCTS LIMITED	North America	Canada	No	259.76	35.8199	13.7896	1	0
1040	T0952 1	A & A TRADING LTD.	North America	Canada	No	203.206	35.7225	17.5795	2	0
1041	T0952 2	A & A TRADING LTD.	North America	Canada	No	109.529	35.1363	32.0795	2	0
1042	T0550 0	LOUISIANA-PACIFIC CANADA LTD.	North America	Canada	No	632.618	33.3211	5.26718	1	0
1043	UAF 09551k	Unknown	North America	Canada	No	32.8796	32.8796	100	1	0
1044	T0476 1	COAST TSIMSHIAN RESOURCES LIMITED PARTNERSHIP	North America	Canada	No	258.341	32.3696	12.5298	1	0
1045	PT. TUNGGAL AGATHIS b	Unknown	Asia	Indonesia	No	31032.2	31.9835	0.103066	5	4
1046	T0690 1	INTERNATIONAL FOREST PRODUCTS LIMITED	North America	Canada	No	262.417	30.65	11.6799	1	0
1047	K2M 4 SCHEDULE_B	MCLEOD LAKE MACKENZIE COMMUNITY FOREST LIMITED PARTNERSHIP	North America	Canada	No	2860.89	29.71	1.03849	1	0
1048	T0830 1	CHEAKAMUS COMMUNITY FOREST LIMITED PARTNERSHIP.	North America	Canada	No	267.211	28.425	10.6376	1	0
1049	UAF 08664j	Unknown	North America	Canada	No	28.3478	28.3478	100	1	0
1050	T/0229 Board of Trustees Sarawak Foundation	STIDC / Sarawak Foundation	Asia	Malaysia	No	8566.57	28.031	0.327214	1	0
1051	T/9161 STIDC (Part 5)	STIDC / Sarawak Foundation	Asia	Malaysia	No	33815.1	28.004	0.0828153	1	0
1052	UAF 09451e	Unknown	North America	Canada	No	27.1944	27.1944	100	1	0
1053	T0955 1	WEST FRASER MILLS LTD.	North America	Canada	Yes	222.137	26.9115	12.1148	1	0
1054	T0633 2	DEAN CHANNEL FOREST PRODUCTS LTD.	North America	Canada	No	597.802	26.8818	4.49677	1	0
1055	W0201 A SCHEDULE_B	RAYMOND THIESSEN	North America	Canada	No	599.994	25.6217	4.27032	1	0
1056	UAF 09451b	Unknown	North America	Canada	No	25.5548	25.5548	100	1	0
1057	T/9155 Sara Tourism	Other / Unknown	Asia	Malaysia	No	60235.1	24.8326	0.0412261	1	0
1058	T/9090 Kubang Sri Jaya SB	Other / Unknown	Asia	Malaysia	No	11353.5	24.2513	0.213603	1	0
1059	K2M 2 SCHEDULE_B	MCLEOD LAKE MACKENZIE COMMUNITY FOREST LIMITED PARTNERSHIP	North America	Canada	No	3795.73	23.9083	0.629873	2	0
1060	T0377 3	A & A TRADING LTD.	North America	Canada	No	4301.19	23.6364	0.549531	3	0
1061	K3H 6 SCHEDULE_B	NUXALK FORESTRY LIMITED PARTNERSHIP	North America	Canada	No	4696.58	23.6321	0.503176	3	0
1062	PT.TELUK BINTUNI MINA AGRO K a	Unknown	Asia	Indonesia	No	212871	23.3775	0.010982	1	0
1063	W1828 B SCHEDULE_B	DAVID PEAKER	North America	Canada	No	139.749	23.0369	16.4845	1	0
1064	ООО «Группа компаний «УЛК» (ОП Устьянский леспромхоз)	ULK Group LLC	Eurasia	Russia	Yes	917896	22.8815	0.00249282	1	0
1065	Arrowsmith TSA, Barkley S.B.38Aaq	Unknown	North America	Canada	No	181.938	22.22	12.213	1	0
1066	T0713 4	GILBERT SMITH FOREST PRODUCTS LTD.	North America	Canada	No	1465.51	21.6291	1.47587	1	0
1067	UAF 08562e	Unknown	North America	Canada	No	21.3323	21.3323	100	1	0
1068	T0295 5	WESTERN FOREST PRODUCTS INC.	North America	Canada	Yes	290.756	20.3722	7.00663	1	0
1069	Strathcona TSA Kyuquot Block37B	Unknown	North America	Canada	No	20062.2	19.7472	0.0984302	2	0
1070	UAF 09452k	Unknown	North America	Canada	No	19.2698	19.2698	100	1	0
1071	T0614 2	DEAN CHANNEL FOREST PRODUCTS LTD.	North America	Canada	No	322.752	18.8151	5.8296	1	0
1072	YINGUI	Unknown	Africa	Cameroon	No	14346	18.1804	0.126728	1	0
1073	T0690 3	INTERNATIONAL FOREST PRODUCTS LIMITED	North America	Canada	No	271.956	17.4515	6.41701	1	0
1074	T/9161 STIDC (Part 2)	STIDC / Sarawak Foundation	Asia	Malaysia	No	25278.4	17.2593	0.0682767	1	0
1075	T0715 1	WESTERN FOREST PRODUCTS INC.	North America	Canada	Yes	630.855	16.8351	2.66862	1	0
1076	UAF 09352a	Unknown	North America	Canada	No	16.4374	16.4374	100	1	0
1077	T0279 1	HUSBY FOREST PRODUCTS LTD.	North America	Canada	No	258.735	15.6281	6.0402	1	0
1078	T0760 1	WESTERN FOREST PRODUCTS INC.	North America	Canada	Yes	315.615	14.9302	4.73051	1	0
1079	W0132 A SCHEDULE_B	ROBERT WAGNER	North America	Canada	No	600.046	14.2187	2.3696	1	0
1080	UAF 02751c	Unknown	North America	Canada	No	14.1362	14.1362	100	1	0
1081	T0280 2	WESTERN FOREST PRODUCTS INC.	North America	Canada	Yes	625.615	13.8588	2.21523	3	0
1082	T0614 1	DEAN CHANNEL FOREST PRODUCTS LTD.	North America	Canada	No	303.304	13.5496	4.46734	2	0
1083	T0713 10	GILBERT SMITH FOREST PRODUCTS LTD.	North America	Canada	No	1029.41	13.1153	1.27406	1	0
1084	T0730 13	WESTERN FOREST PRODUCTS INC.	North America	Canada	Yes	265.062	13.029	4.91544	1	0
1085	UAF 02751d	Unknown	North America	Canada	No	12.4439	12.4439	100	1	0
1086	T0236 1	WESTERN FOREST PRODUCTS INC.	North America	Canada	Yes	1709.81	11.5268	0.674158	1	0
1087	T0280 1	WESTERN FOREST PRODUCTS INC.	North America	Canada	Yes	231.853	11.4682	4.94632	1	0
1088	UAF 09451f	Unknown	North America	Canada	No	11.3583	11.3583	100	1	0
1089	T0690 11	INTERNATIONAL FOREST PRODUCTS LIMITED	North America	Canada	No	257.347	10.2031	3.96472	1	0
1090	T0106 0	WEYERHAEUSER COMPANY LIMITED	North America	Canada	No	231.718	10.1653	4.38693	2	0
1091	PT.DAHATAMA ADI KARYA	Unknown	Asia	Indonesia	No	65432.2	9.73578	0.0148792	1	0
1092	T0690 9	INTERNATIONAL FOREST PRODUCTS LIMITED	North America	Canada	No	258.463	9.55647	3.69743	1	0
1093	Arrow TSA Block I01I	Unknown	North America	Canada	No	78899.5	9.38456	0.0118943	2	0
1094	UAF 09452f	Unknown	North America	Canada	No	9.10024	9.10024	100	1	0
1095	PT.RIMBA MEGAH LESTARI	Unknown	Asia	Indonesia	No	251327	9.09499	0.00361878	2	0
1096	Wms Lk TSA Cariboo Block29L	Unknown	North America	Canada	No	283014	8.72505	0.0030829	4	0
1097	T0295 16	WESTERN FOREST PRODUCTS INC.	North America	Canada	Yes	261.308	8.68238	3.32266	1	0
1098	T0690 7	INTERNATIONAL FOREST PRODUCTS LIMITED	North America	Canada	No	256.544	8.48129	3.30598	1	0
1099	UAF 02661l	Unknown	North America	Canada	No	8.37526	8.37526	100	1	0
1100	T1001 0b	INTERNATIONAL FOREST PRODUCTS LIMITED	North America	Canada	No	889.49	8.32892	0.93637	1	0
1101	K3H 5 SCHEDULE_B	NUXALK FORESTRY LIMITED PARTNERSHIP	North America	Canada	No	1924.77	8.32692	0.432618	1	0
1102	UAF 08665d	Unknown	North America	Canada	No	8.22131	8.22131	100	1	0
1103	UAF 08652l	Unknown	North America	Canada	No	7806.81	7.90808	0.101297	2	0
1104	Arrow TSA Block B01Bj	Unknown	North America	Canada	No	276.258	7.5374	2.7284	1	0
1105	W0491 A SCHEDULE_B	PROGRESSIVE FOREST MANAGEMENT LTD.	North America	Canada	No	461.074	7.48758	1.62394	1	0
1106	T0398 0	INTERNATIONAL FOREST PRODUCTS LIMITED	North America	Canada	No	654.139	7.43609	1.13677	1	0
1107	Kalum TSA Block F10Fc	Unknown	North America	Canada	No	2096.69	7.31606	0.348934	1	0
1108	T0690 16	INTERNATIONAL FOREST PRODUCTS LIMITED	North America	Canada	No	258.016	7.18569	2.78498	2	0
1109	UAF 02452al	Unknown	North America	Canada	No	6.59458	6.59458	100	1	0
1110	Queen Charlotte TSA Block B25Be	Unknown	North America	Canada	No	102.278	6.53421	6.38867	1	0
1111	UAF 03152c	Unknown	North America	Canada	No	40.2152	6.29615	15.6561	1	0
1112	UAF 02661a	Unknown	North America	Canada	No	6.22847	6.22847	100	1	0
1113	T0006 3	WESTERN FOREST PRODUCTS INC.	North America	Canada	Yes	259.048	5.87986	2.26979	1	0
1114	UAF 02661t	Unknown	North America	Canada	No	5.62067	5.62067	100	1	0
1115	UAF 09551f	Unknown	North America	Canada	No	5.38842	5.38842	100	1	0
1116	T0190 1	INTERNATIONAL FOREST PRODUCTS LIMITED	North America	Canada	No	1991.26	5.26072	0.264191	1	0
1117	North Coast TSA Skeena Block21Cs	Unknown	North America	Canada	No	340.091	4.76827	1.40206	1	0
1118	10-063	Unknown	Africa	Cameroon	No	69149.8	4.70817	0.00680866	1	0
1119	T0438 1	INTERNATIONAL FOREST PRODUCTS LIMITED	North America	Canada	No	342.397	4.69403	1.37093	1	0
1120	Mid-Coast TSA Block B19Bc	Unknown	North America	Canada	No	196.861	4.65189	2.36304	1	0
1121	T1000 1	WESTERN FOREST PRODUCTS INC.	North America	Canada	Yes	247.772	4.53302	1.82951	1	0
1122	UAF 02452ak	Unknown	North America	Canada	No	3.97802	3.97802	100	1	0
1123	T0834 2	IISAAK FOREST RESOURCES LIMITED	North America	Canada	No	196.086	3.9481	2.01345	1	0
1124	T0808 1	MACMILLAN BLOEDEL LIMITED	North America	Canada	No	232.214	3.80892	1.64026	1	0
1125	UAF 02661k	Unknown	North America	Canada	No	3.76098	3.76098	100	1	0
1126	UAF 09551a	Unknown	North America	Canada	No	3.6721	3.6721	100	1	0
1127	UAF 08666a	Unknown	North America	Canada	No	3.61882	3.61882	100	1	0
1128	T0225 2	WESTERN FOREST PRODUCTS INC.	North America	Canada	Yes	137.948	3.61761	2.62244	1	0
1129	TFL57f	Unknown	North America	Canada	No	1323.28	3.57181	0.269922	1	0
1130	T0635 5	CANOE FOREST PRODUCTS LTD.	North America	Canada	No	2024.9	3.48057	0.171889	1	0
1131	UAF 09551j	Unknown	North America	Canada	No	3.43419	3.43419	100	1	0
1132	UAF 08666j	Unknown	North America	Canada	No	3.3611	3.3611	100	1	0
1133	UAF 02452at	Unknown	North America	Canada	No	3.13043	3.13043	100	1	0
1134	UAF 09352i	Unknown	North America	Canada	No	3.05984	3.05984	100	1	0
1135	T0726 3	WESTERN FOREST PRODUCTS INC.	North America	Canada	Yes	259.241	3.03252	1.16977	1	0
1136	W1684 A SCHEDULE_A	N'QUATQUA LOGGING CO. LTD.	North America	Canada	No	94.6903	2.99799	3.16611	1	0
1137	T0606 1	LOUISIANA-PACIFIC CANADA LTD.	North America	Canada	No	276.716	2.99145	1.08105	1	0
1138	T0269 1	WESTERN FOREST PRODUCTS INC.	North America	Canada	Yes	975.983	2.88808	0.295915	1	0
1139	UAF 09551h	Unknown	North America	Canada	No	2.85669	2.85669	100	1	0
1140	T0467 A1	TOLKO INDUSTRIES LTD.	North America	Canada	No	126.731	2.81931	2.22465	1	0
1141	T0830 27	CHEAKAMUS COMMUNITY FOREST LIMITED PARTNERSHIP.	North America	Canada	No	118.235	2.78615	2.35646	1	0
1142	UAF 02661b	Unknown	North America	Canada	No	2.75056	2.75056	100	1	0
1143	W1462 B SCHEDULE_B	DISTRICT MGR SKEENA STIKINE (DSS)	North America	Canada	No	639.961	2.65662	0.415122	1	0
1144	T0333 0	BIPORT FOREST PRODUCTS LTD.	North America	Canada	No	256.964	2.57603	1.00249	1	0
1145	T0730 18	WESTERN FOREST PRODUCTS INC.	North America	Canada	Yes	268.358	2.54003	0.946508	1	0
1146	W0498 A SCHEDULE_B	GARY BURNS	North America	Canada	No	60.6418	2.52828	4.1692	1	0
1147	UAF 09452m	Unknown	North America	Canada	No	2.51817	2.51817	100	1	0
1148	UAF 02661v	Unknown	North America	Canada	No	2.31773	2.31773	100	1	0
1149	CBPP (Licensed)n	Corner Brook Pulp and Paper Limited	North America	Canada	No	6235.52	2.31328	0.0370984	1	0
1150	T/0367 Syarikat Hariyama SB (Part 2)	Other / Unknown	Asia	Malaysia	No	7967.28	2.28346	0.0286605	1	0
1151	UAF 02452ao	Unknown	North America	Canada	No	2.07686	2.07686	100	1	0
1152	UAF 09452n	Unknown	North America	Canada	No	2.06559	2.06559	100	1	0
1153	Arrow TSA Block B01Bf	Unknown	North America	Canada	No	176.943	2.05652	1.16225	1	0
1154	UAF 09352k	Unknown	North America	Canada	No	1.85987	1.85987	100	1	0
1155	T0690 5	INTERNATIONAL FOREST PRODUCTS LIMITED	North America	Canada	No	254.982	1.77587	0.696467	1	0
1156	UAF 09551b	Unknown	North America	Canada	No	1.76396	1.76396	100	1	0
1157	UAF 09452d	Unknown	North America	Canada	No	7.4779	1.67558	22.407	0	0
1158	UAF 09452c	Unknown	North America	Canada	No	1.6081	1.6081	100	1	0
1159	UAF 02452aq	Unknown	North America	Canada	No	1.39329	1.39329	100	1	0
1160	UAF 02451c	Unknown	North America	Canada	No	1.38465	1.38465	100	1	0
1161	UAF 09352j	Unknown	North America	Canada	No	1.36812	1.36812	100	1	0
1162	UAF 02452ba	Unknown	North America	Canada	No	1.35553	1.35553	100	1	0
1163	T0713 9	GILBERT SMITH FOREST PRODUCTS LTD.	North America	Canada	No	1503.58	1.34474	0.0894356	1	0
1164	UAF 02661c	Unknown	North America	Canada	No	1.21865	1.21865	100	1	0
1165	W0366 A SCHEDULE_B	SOUTH CHILCOTIN PARK GUEST RANCH LTD.	North America	Canada	No	600.901	1.21047	0.201442	1	0
1166	UAF 08664f	Unknown	North America	Canada	No	1.1642	1.1642	100	1	0
1167	UAF 02452as	Unknown	North America	Canada	No	1.13313	1.13313	100	1	0
1168	Invermere TSA Block C09Cc	Unknown	North America	Canada	No	68701.1	1.12102	0.00163173	1	0
1169	UAF 09551g	Unknown	North America	Canada	No	1.08556	1.08556	100	1	0
1170	T0605 5	NORTHWOOD INC.	North America	Canada	No	259.094	1.06693	0.411792	1	0
1171	UAF 08562b	Unknown	North America	Canada	No	1.05395	1.05395	100	1	0
1172	T0744 1	WESTERN FOREST PRODUCTS INC.	North America	Canada	Yes	260.112	1.0281	0.395251	1	0
1173	UAF 08665e	Unknown	North America	Canada	No	1.02693	1.02693	100	1	0
1174	W0144 A SCHEDULE_A	WILHELM PENNER	North America	Canada	No	41.3324	1.02688	2.48445	1	0
